# Supplementary material for: Identification of Potential Abnormal Methylation-Modified Genes in Coronary Artery Ectasia
Source: Hindawi journal article supplement (doi:10.1155/2023/4969605), 2023-08-26
Supplement: f2 [file 4969605.f2.pdf]

| gene     |       |
|----------|-------|
| MARCHF4  | hyper |
| MARCHF8  | hyper |
| SEPTIN4  | hypo  |
| SEPTIN8  | hyper |
| SEPTIN9  | hypo  |
| SEPTIN10 | hyper |
| SELENOF  | hyper |
| A2LD1    | hypo  |
| A4GALT   | hypo  |
| AADACL3  | hyper |
| AAK1     | hyper |
| AARS     | hyper |
| AASDHPPT | hypo  |
| AASS     | hyper |
| AATK     | hypo  |
| ABCA11P  | hyper |
| ABCA17P  | hyper |
| ABCA4    | hyper |
| ABCA7    | hypo  |
| ABCB1    | hyper |
| ABCB4    | hyper |
| ABCB8    | hypo  |
| ABCC1    | hyper |
| ABCC10   | hypo  |
| ABCC4    | hypo  |
| ABCC8    | hyper |
| ABCD2    | hyper |
| ABCF1    | hypo  |
| ABCG1    | hyper |
| ABCG2    | hypo  |
| ABCG8    | hypo  |
| ABHD4    | hyper |
| ABI3     | hypo  |
| ABLIM1   | hyper |
| ABLIM3   | hyper |
| ABO      | hyper |
| ABTB2    | hypo  |
| ACAA1    | hypo  |
| ACAD10   | hypo  |
| ACADL    | hypo  |
| ACAP1    | hyper |
| ACAT2    | hypo  |
| ACBD3    | hypo  |
| ACCS     | hypo  |
| ACHE     | hypo  |
| ACLY     | hyper |
| ACO1     | hypo  |
| ACOT8    | hypo  |
| ACOXL    | hypo  |
| ACP1     | hyper |
| ACP6     | hypo  |
| ACPL2    | hyper |
| ACPT     | hypo  |
| ACRV1    | hypo  |
| ACSF3    | hypo  |
| ACSL3    | hyper |
| ACTA2    | hyper |

|          |       |
|----------|-------|
| ACTC1    | hyper |
| ACTL7B   | hypo  |
| ACTN3    | hypo  |
| ACVRL1   | hyper |
| ADAM12   | hyper |
| ADAM15   | hypo  |
| ADAM22   | hyper |
| ADAM28   | hyper |
| ADAM30   | hyper |
| ADAM32   | hyper |
| ADAM7    | hyper |
| ADAMTS1  | hyper |
| ADAMTS10 | hyper |
| ADAMTS13 | hyper |
| ADAMTS16 | hyper |
| ADAMTS18 | hyper |
| ADAMTS6  | hypo  |
| ADAMTSL2 | hypo  |
| ADC      | hypo  |
| ADCK1    | hyper |
| ADCK5    | hyper |
| ADCY1    | hyper |
| ADCY10   | hypo  |
| ADCY8    | hyper |
| ADCY9    | hyper |
| ADCYAP1  | hypo  |
| ADD2     | hyper |
| ADI1     | hyper |
| ADIPOR2  | hyper |
| ADM      | hypo  |
| ADM2     | hyper |
| ADNP     | hypo  |
| ADO      | hypo  |
| ADORA1   | hypo  |
| ADPRH    | hypo  |
| ADPRHL1  | hypo  |
| ADSL     | hypo  |
| AEN      | hypo  |
| AFAP1L1  | hypo  |
| AFF1     | hyper |
| AFF3     | hypo  |
| AFG3L2   | hypo  |
| AFTPH    | hyper |
| AGA      | hypo  |
| AGAP2    | hyper |
| AGAP3    | hyper |
| AGBL1    | hypo  |
| AGBL3    | hyper |
| AGPAT3   | hyper |
| AGPAT4   | hyper |
| AGXT2L1  | hypo  |
| AHCTF1   | hypo  |
| AHCY     | hyper |
| AHSA2    | hypo  |
| AIDA     | hypo  |
| AIFM2    | hypo  |
| AIMP1    | hypo  |
| AIRE     | hypo  |

|           |       |
|-----------|-------|
| AKAP11    | hypo  |
| AKAP13    | hyper |
| AKAP9     | hypo  |
| AKD1      | hyper |
| AKNAD1    | hyper |
| ALAD      | hyper |
| ALDH1A2   | hypo  |
| ALDH1A3   | hyper |
| ALDH1B1   | hyper |
| ALDH2     | hypo  |
| ALDH3A1   | hypo  |
| ALDH3A2   | hyper |
| ALDH3B2   | hypo  |
| ALDH5A1   | hyper |
| ALDOA     | hyper |
| ALG10B    | hypo  |
| ALG14     | hypo  |
| ALG3      | hypo  |
| ALKBH6    | hyper |
| ALKBH7    | hyper |
| ALOX15    | hyper |
| ALOXE3    | hypo  |
| ALPK1     | hyper |
| ALPL      | hyper |
| ALPP      | hypo  |
| ALPPL2    | hypo  |
| ALS2      | hypo  |
| ALS2CL    | hypo  |
| ALX3      | hypo  |
| ALX4      | hyper |
| AMDHD1    | hyper |
| AMDHD2    | hypo  |
| AMH       | hyper |
| AMN       | hyper |
| ANG       | hyper |
| ANGEL2    | hypo  |
| ANGPTL6   | hyper |
| ANK1      | hypo  |
| ANKAR     | hypo  |
| ANKK1     | hyper |
| ANKLE1    | hyper |
| ANKRD17   | hyper |
| ANKRD24   | hypo  |
| ANKRD26P1 | hyper |
| ANKRD33B  | hyper |
| ANKRD34A  | hyper |
| ANKRD43   | hyper |
| ANKRD44   | hypo  |
| ANKRD53   | hypo  |
| ANKRD54   | hypo  |
| ANKRD9    | hyper |
| ANKS1A    | hyper |
| ANKS3     | hypo  |
| ANKS6     | hypo  |
| ANLN      | hypo  |
| ANO10     | hypo  |
| ANO5      | hyper |
| ANO7      | hyper |

|          |       |
|----------|-------|
| ANO9     | hypo  |
| ANP32A   | hyper |
| ANP32E   | hypo  |
| ANTXR2   | hypo  |
| ANUBL1   | hyper |
| ANXA13   | hyper |
| ANXA4    | hyper |
| AOC3     | hypo  |
| AP1AR    | hypo  |
| AP1S3    | hypo  |
| AP2B1    | hypo  |
| AP3B2    | hypo  |
| APC2     | hyper |
| APCDD1   | hyper |
| APEH     | hypo  |
| APLP2    | hypo  |
| APOB48R  | hyper |
| APOC4    | hypo  |
| AQP11    | hyper |
| AQP2     | hypo  |
| AQP4     | hyper |
| ARC      | hyper |
| ARCN1    | hyper |
| ARF5     | hyper |
| ARF6     | hyper |
| ARFGAP3  | hyper |
| ARFIP1   | hyper |
| ARHGAP10 | hypo  |
| ARHGAP19 | hyper |
| ARHGAP22 | hyper |
| ARHGAP27 | hyper |
| ARHGAP9  | hyper |
| ARHGDIG  | hyper |
| ARHGEF15 | hypo  |
| ARHGEF16 | hypo  |
| ARHGEF17 | hyper |
| ARHGEF18 | hyper |
| ARID1A   | hyper |
| ARID3A   | hyper |
| ARID3B   | hyper |
| ARID5B   | hypo  |
| ARL2BP   | hypo  |
| ARL4A    | hyper |
| ARL4C    | hypo  |
| ARL5B    | hypo  |
| ARL6IP1  | hypo  |
| ARL6IP5  | hypo  |
| ARL8A    | hypo  |
| ARMC1    | hyper |
| ARNTL2   | hypo  |
| ARPC1B   | hyper |
| ARPC4    | hypo  |
| ARPC5L   | hypo  |
| ARRDC4   | hyper |
| ART3     | hyper |
| ART5     | hypo  |
| AS3MT    | hyper |
| ASAM     | hypo  |

|          |       |
|----------|-------|
| ASAP1    | hyper |
| ASAP1IT1 | hyper |
| ASB5     | hyper |
| ASB6     | hyper |
| ASCL2    | hyper |
| ASPHD2   | hypo  |
| ASPSCR1  | hypo  |
| ATCAY    | hyper |
| ATG12    | hyper |
| ATG2A    | hypo  |
| ATG4B    | hyper |
| ATG9B    | hypo  |
| ATL1     | hyper |
| ATM      | hypo  |
| ATMIN    | hyper |
| ATOH8    | hyper |
| ATP10D   | hypo  |
| ATP13A2  | hypo  |
| ATP13A3  | hypo  |
| ATP1B2   | hyper |
| ATP2A3   | hyper |
| ATP2C2   | hyper |
| ATP4B    | hypo  |
| ATP5B    | hypo  |
| ATP5D    | hyper |
| ATP6AP1L | hypo  |
| ATP6V0C  | hyper |
| ATP6V0E2 | hyper |
| ATP6V1C1 | hypo  |
| ATP8A2   | hyper |
| ATP8B1   | hyper |
| ATP8B3   | hyper |
| ATXN1    | hypo  |
| ATXN3    | hypo  |
| ATXN7L1  | hyper |
| AURKAIP1 | hyper |
| AVL9     | hyper |
| AVP      | hyper |
| AVPR1A   | hyper |
| AXIN2    | hypo  |
| B3GALT4  | hyper |
| B3GNT2   | hypo  |
| B3GNT8   | hyper |
| B4GALNT1 | hypo  |
| B4GALNT2 | hyper |
| B4GALNT4 | hyper |
| B4GALT2  | hyper |
| B4GALT5  | hyper |
| BACH1    | hyper |
| BACH2    | hyper |
| BAD      | hypo  |
| BAHCC1   | hyper |
| BAHD1    | hypo  |
| BAI2     | hyper |
| BAI3     | hyper |
| BAIAP2   | hyper |
| BAIAP2L2 | hypo  |
| BANF1    | hypo  |

|         |       |
|---------|-------|
| BARHL1  | hyper |
| BARHL2  | hyper |
| BARX2   | hypo  |
| BAT1    | hypo  |
| BAT4    | hyper |
| BAZ2A   | hyper |
| BAZ2B   | hyper |
| BBS5    | hyper |
| BCAP29  | hyper |
| BCAR1   | hypo  |
| BCAS3   | hyper |
| BCAT1   | hyper |
| BCDIN3D | hyper |
| BCKDHA  | hypo  |
| BCL10   | hyper |
| BCL6    | hypo  |
| BCL9L   | hyper |
| BCO2    | hyper |
| BDH1    | hyper |
| BDKRB2  | hyper |
| BEND3   | hypo  |
| BEST1   | hypo  |
| BFAR    | hypo  |
| BFSP1   | hyper |
| BHLHE41 | hyper |
| BHMT2   | hyper |
| BICC1   | hyper |
| BICD1   | hyper |
| BIK     | hypo  |
| BIRC2   | hypo  |
| BLNK    | hypo  |
| BLOC1S1 | hypo  |
| BLOC1S2 | hypo  |
| BLOC1S3 | hyper |
| BMF     | hypo  |
| BMI1    | hyper |
| BMP1    | hyper |
| BMP10   | hypo  |
| BMP3    | hyper |
| BMP7    | hyper |
| BMP8A   | hyper |
| BMP8B   | hyper |
| BMPER   | hyper |
| BMPR1A  | hypo  |
| BMPR2   | hypo  |
| BMS1P4  | hypo  |
| BNC2    | hyper |
| BNIP3   | hyper |
| BOP1    | hypo  |
| BPI     | hypo  |
| BPIL2   | hypo  |
| BPNT1   | hypo  |
| BPTF    | hyper |
| BRAF    | hyper |
| BRCA1   | hyper |
| BRD2    | hyper |
| BRD9    | hypo  |
| BRF1    | hypo  |

|           |       |
|-----------|-------|
| BRF2      | hyper |
| BRIX1     | hypo  |
| BRMS1     | hyper |
| BRMS1L    | hypo  |
| BRUNOL4   | hyper |
| BRUNOL6   | hypo  |
| BSG       | hyper |
| BSN       | hypo  |
| BTBD12    | hyper |
| BTD       | hyper |
| BTF3L4    | hyper |
| BTNL8     | hypo  |
| BTNL9     | hypo  |
| BUB1      | hypo  |
| BUD31     | hyper |
| BZRAP1    | hyper |
| C10orf10  | hyper |
| C10orf107 | hyper |
| C10orf11  | hypo  |
| C10orf110 | hyper |
| C10orf116 | hyper |
| C10orf140 | hyper |
| C10orf2   | hyper |
| C10orf25  | hypo  |
| C10orf27  | hypo  |
| C10orf46  | hypo  |
| C10orf54  | hyper |
| C10orf62  | hyper |
| C10orf67  | hyper |
| C11orf10  | hyper |
| C11orf30  | hyper |
| C11orf35  | hyper |
| C11orf60  | hypo  |
| C11orf65  | hypo  |
| C11orf68  | hypo  |
| C11orf75  | hypo  |
| C11orf86  | hypo  |
| C11orf93  | hyper |
| C12orf34  | hypo  |
| C12orf49  | hypo  |
| C12orf61  | hypo  |
| C12orf62  | hypo  |
| C13orf15  | hypo  |
| C13orf16  | hypo  |
| C13orf18  | hypo  |
| C13orf28  | hyper |
| C13orf35  | hypo  |
| C13orf36  | hyper |
| C14orf105 | hyper |
| C14orf115 | hypo  |
| C14orf135 | hypo  |
| C14orf182 | hyper |
| C14orf184 | hypo  |
| C14orf23  | hyper |
| C14orf37  | hypo  |
| C14orf38  | hyper |
| C14orf68  | hypo  |
| C14orf93  | hyper |

|           |       |
|-----------|-------|
| C15orf27  | hyper |
| C15orf33  | hypo  |
| C15orf60  | hyper |
| C16orf38  | hyper |
| C16orf45  | hyper |
| C16orf53  | hyper |
| C16orf55  | hypo  |
| C16orf58  | hypo  |
| C16orf62  | hyper |
| C16orf63  | hypo  |
| C16orf7   | hyper |
| C16orf70  | hyper |
| C17orf104 | hyper |
| C17orf39  | hypo  |
| C17orf49  | hypo  |
| C17orf57  | hypo  |
| C17orf59  | hypo  |
| C17orf70  | hypo  |
| C17orf79  | hyper |
| C17orf97  | hyper |
| C18orf1   | hyper |
| C18orf34  | hypo  |
| C18orf54  | hypo  |
| C19orf21  | hypo  |
| C19orf26  | hyper |
| C19orf29  | hypo  |
| C19orf30  | hyper |
| C19orf35  | hypo  |
| C19orf44  | hypo  |
| C19orf50  | hypo  |
| C19orf51  | hyper |
| C19orf61  | hypo  |
| C1D       | hypo  |
| C1orf105  | hypo  |
| C1orf109  | hyper |
| C1orf114  | hyper |
| C1orf130  | hyper |
| C1orf151  | hyper |
| C1orf158  | hypo  |
| C1orf172  | hyper |
| C1orf175  | hyper |
| C1orf192  | hyper |
| C1orf213  | hyper |
| C1orf228  | hypo  |
| C1orf229  | hyper |
| C1orf43   | hypo  |
| C1orf57   | hyper |
| C1orf86   | hyper |
| C1orf88   | hyper |
| C1orf92   | hypo  |
| C1orf94   | hypo  |
| C1QB      | hypo  |
| C1QL1     | hyper |
| C1QL3     | hypo  |
| C1QTNF5   | hypo  |
| C1QTNF8   | hyper |
| C1QTNF9   | hyper |
| C1RL      | hypo  |



|           |       |
|-----------|-------|
| C1S       | hypo  |
| C2        | hyper |
| C20orf118 | hypo  |
| C20orf152 | hypo  |
| C20orf177 | hypo  |
| C20orf194 | hyper |
| C20orf24  | hypo  |
| C20orf29  | hypo  |
| C20orf4   | hypo  |
| C20orf43  | hyper |
| C20orf94  | hypo  |
| C21orf45  | hyper |
| C21orf57  | hypo  |
| C21orf66  | hypo  |
| C21orf82  | hyper |
| C22orf23  | hypo  |
| C22orf24  | hypo  |
| C22orf40  | hypo  |
| C2CD2     | hyper |
| C2CD4C    | hypo  |
| C2orf3    | hypo  |
| C2orf39   | hyper |
| C2orf40   | hyper |
| C2orf42   | hyper |
| C2orf49   | hyper |
| C2orf55   | hyper |
| C2orf60   | hypo  |
| C2orf61   | hypo  |
| C2orf63   | hypo  |
| C2orf83   | hypo  |
| C2orf86   | hyper |
| C2orf89   | hyper |
| C3        | hypo  |
| C3orf14   | hyper |
| C3orf17   | hyper |
| C3orf21   | hypo  |
| C3orf31   | hypo  |
| C3orf39   | hyper |
| C3orf45   | hypo  |
| C3orf54   | hypo  |
| C3orf57   | hyper |
| C3orf58   | hypo  |
| C3orf67   | hyper |
| C3orf70   | hyper |
| C3orf75   | hypo  |
| C4orf19   | hyper |
| C4orf23   | hyper |
| C4orf31   | hypo  |
| C4orf35   | hyper |
| C4orf39   | hypo  |
| C4orf41   | hypo  |
| C4orf42   | hyper |
| C4orf43   | hypo  |
| C4orf44   | hypo  |
| C4orf49   | hyper |
| C5orf22   | hypo  |
| C5orf49   | hyper |
| C5orf52   | hypo  |

|          |       |
|----------|-------|
| C6orf10  | hypo  |
| C6orf130 | hyper |
| C6orf132 | hypo  |
| C6orf136 | hyper |
| C6orf141 | hypo  |
| C6orf142 | hyper |
| C6orf146 | hyper |
| C6orf147 | hyper |
| C6orf153 | hypo  |
| C6orf162 | hypo  |
| C6orf221 | hyper |
| C6orf25  | hypo  |
| C6orf26  | hyper |
| C6orf35  | hyper |
| C6orf48  | hypo  |
| C6orf62  | hypo  |
| C6orf72  | hyper |
| C6orf89  | hypo  |
| C7orf16  | hypo  |
| C7orf20  | hypo  |
| C7orf23  | hyper |
| C7orf26  | hyper |
| C7orf27  | hypo  |
| C7orf31  | hypo  |
| C7orf47  | hypo  |
| C7orf50  | hyper |
| C7orf52  | hyper |
| C7orf57  | hyper |
| C7orf64  | hyper |
| C7orf72  | hypo  |
| C8orf4   | hyper |
| C8orf40  | hyper |
| C8orf45  | hypo  |
| C8orf59  | hypo  |
| C8orf73  | hyper |
| C8orf75  | hyper |
| C8ORFK29 | hypo  |
| C9orf116 | hyper |
| C9orf122 | hyper |
| C9orf23  | hypo  |
| C9orf3   | hypo  |
| C9orf43  | hypo  |
| C9orf47  | hyper |
| C9orf68  | hyper |
| C9orf89  | hypo  |
| C9orf98  | hypo  |
| CA12     | hypo  |
| CA14     | hyper |
| CA3      | hyper |
| CA5A     | hyper |
| CAB39    | hypo  |
| CABLES1  | hyper |
| CABLES2  | hypo  |
| CACNA1A  | hypo  |
| CACNA1C  | hyper |
| CACNA1D  | hypo  |
| CACNA1E  | hyper |
| CACNA1G  | hypo  |

|          |       |
|----------|-------|
| CACNA1I  | hyper |
| CACNA2D3 | hypo  |
| CACNB4   | hyper |
| CACNG2   | hyper |
| CACNG3   | hyper |
| CACNG8   | hyper |
| CACYBP   | hypo  |
| CADM1    | hyper |
| CADM2    | hyper |
| CALCB    | hyper |
| CALCOCO1 | hyper |
| CALCOCO2 | hyper |
| CALHM1   | hyper |
| CALHM2   | hyper |
| CALM1    | hypo  |
| CALR     | hypo  |
| CAMK2A   | hypo  |
| CAMK2B   | hyper |
| CAMKV    | hyper |
| CAMLG    | hyper |
| CAND2    | hypo  |
| CANT1    | hyper |
| CAP2     | hyper |
| CAPN1    | hypo  |
| CAPN10   | hypo  |
| CAPN9    | hypo  |
| CAPS     | hypo  |
| CAPS2    | hypo  |
| CARD11   | hyper |
| CARD14   | hyper |
| CARKD    | hyper |
| CARTPT   | hyper |
| CASC2    | hypo  |
| CASKIN1  | hypo  |
| CASP7    | hypo  |
| CASQ2    | hypo  |
| CASZ1    | hypo  |
| CAT      | hypo  |
| CATSPER1 | hypo  |
| CATSPERG | hypo  |
| CAV1     | hypo  |
| CBFA2T3  | hyper |
| CBLL1    | hypo  |
| CBS      | hyper |
| CBX4     | hyper |
| CCAR1    | hypo  |
| CCDC102B | hypo  |
| CCDC103  | hypo  |
| CCDC105  | hypo  |
| CCDC108  | hypo  |
| CCDC109B | hypo  |
| CCDC110  | hypo  |
| CCDC112  | hyper |
| CCDC116  | hypo  |
| CCDC117  | hypo  |
| CCDC126  | hypo  |
| CCDC130  | hyper |
| CCDC135  | hyper |

|          |       |
|----------|-------|
| CCDC141  | hypo  |
| CCDC146  | hyper |
| CCDC147  | hyper |
| CCDC15   | hypo  |
| CCDC153  | hypo  |
| CCDC162  | hypo  |
| CCDC163P | hypo  |
| CCDC17   | hyper |
| CCDC18   | hypo  |
| CCDC3    | hyper |
| CCDC37   | hypo  |
| CCDC46   | hypo  |
| CCDC48   | hyper |
| CCDC53   | hyper |
| CCDC57   | hypo  |
| CCDC70   | hypo  |
| CCDC76   | hyper |
| CCDC85C  | hypo  |
| CCDC88C  | hypo  |
| CCDC9    | hyper |
| CCHCR1   | hypo  |
| CCKBR    | hyper |
| CCL19    | hyper |
| CCL28    | hyper |
| CCNA2    | hypo  |
| CCNB1    | hypo  |
| CCND1    | hyper |
| CCND2    | hyper |
| CCND3    | hypo  |
| CCNF     | hypo  |
| CCNG1    | hyper |
| CCNJ     | hyper |
| CCR10    | hyper |
| CD160    | hyper |
| CD163L1  | hypo  |
| CD180    | hyper |
| CD19     | hypo  |
| CD200R1  | hyper |
| CD22     | hypo  |
| CD248    | hypo  |
| CD274    | hyper |
| CD276    | hypo  |
| CD33     | hyper |
| CD36     | hypo  |
| CD38     | hypo  |
| CD40     | hyper |
| CD52     | hypo  |
| CD59     | hypo  |
| CD8A     | hyper |
| CD9      | hyper |
| CD97     | hypo  |
| CDC25A   | hyper |
| CDC25C   | hypo  |
| CDC40    | hypo  |
| CDC42    | hypo  |
| CDC42BPA | hyper |
| CDC42EP3 | hyper |
| CDC42EP5 | hyper |

|          |       |
|----------|-------|
| CDC6     | hypo  |
| CDCA7L   | hyper |
| CDCA8    | hyper |
| CDGAP    | hyper |
| CDH1     | hyper |
| CDH11    | hyper |
| CDH12    | hyper |
| CDH18    | hyper |
| CDH2     | hyper |
| CDH23    | hypo  |
| CDH3     | hyper |
| CDH4     | hypo  |
| CDH6     | hyper |
| CDK13    | hyper |
| CDK15    | hyper |
| CDK17    | hyper |
| CDK18    | hyper |
| CDK2AP2  | hypo  |
| CDK5R1   | hyper |
| CDK5R2   | hyper |
| CDK5RAP1 | hyper |
| CDK5RAP2 | hypo  |
| CDKL2    | hyper |
| CDKN1B   | hypo  |
| CDKN1C   | hyper |
| CDKN3    | hyper |
| CDR2L    | hyper |
| CEACAM5  | hypo  |
| CEACAM8  | hyper |
| CEBPZ    | hypo  |
| CELSR2   | hypo  |
| CELSR3   | hyper |
| CENPF    | hyper |
| CENPQ    | hypo  |
| CENPT    | hypo  |
| CENPV    | hyper |
| CEP120   | hypo  |
| CEP164   | hypo  |
| CEP250   | hypo  |
| CEP55    | hyper |
| CEP57    | hypo  |
| CEP78    | hyper |
| CERKL    | hyper |
| CES4     | hyper |
| CGREF1   | hyper |
| CHCHD3   | hyper |
| CHD1L    | hyper |
| CHD5     | hypo  |
| CHFR     | hyper |
| CHGB     | hypo  |
| CHIA     | hyper |
| CHID1    | hyper |
| CHL1     | hyper |
| CHMP4C   | hypo  |
| CHMP6    | hyper |
| CHN1     | hypo  |
| CHP      | hypo  |
| CHRD12   | hyper |

|          |       |
|----------|-------|
| CHRM1    | hypo  |
| CHRM2    | hyper |
| CHRNA2   | hypo  |
| CHRNE    | hypo  |
| CHST11   | hypo  |
| CHST13   | hyper |
| CHSY1    | hypo  |
| CHTF18   | hyper |
| CHTF8    | hypo  |
| CIAO1    | hypo  |
| CIB4     | hypo  |
| CIITA    | hypo  |
| CILP     | hypo  |
| CILP2    | hyper |
| CITED2   | hypo  |
| CITED4   | hyper |
| CKAP2    | hypo  |
| CKB      | hyper |
| CLASP1   | hypo  |
| CLC      | hypo  |
| CLCA1    | hyper |
| CLCA2    | hyper |
| CLCA4    | hyper |
| CLCN1    | hyper |
| CLCN7    | hyper |
| CLCNKA   | hypo  |
| CLDN1    | hypo  |
| CLDN11   | hyper |
| CLDN12   | hypo  |
| CLDN16   | hypo  |
| CLDN6    | hyper |
| CLDN7    | hypo  |
| CLDND1   | hyper |
| CLEC16A  | hyper |
| CLEC2L   | hyper |
| CLEC3B   | hyper |
| CLEC4GP1 | hypo  |
| CLEC9A   | hyper |
| CLIC1    | hyper |
| CLIC5    | hyper |
| CLOCK    | hyper |
| CLPTM1L  | hyper |
| CLRN2    | hypo  |
| CLSTN2   | hyper |
| CLVS1    | hyper |
| CLVS2    | hyper |
| CLYBL    | hyper |
| CMIP     | hyper |
| CMPK1    | hypo  |
| CMTM1    | hyper |
| CMTM2    | hyper |
| CNDP1    | hypo  |
| CNDP2    | hyper |
| CNGB1    | hypo  |
| CNN1     | hypo  |
| CNNM2    | hyper |
| CNOT10   | hypo  |
| CNOT2    | hypo  |

|         |       |
|---------|-------|
| CNOT6L  | hypo  |
| CNP     | hyper |
| CNTD2   | hyper |
| CNTN5   | hyper |
| CNTN6   | hypo  |
| CNTNAP4 | hypo  |
| CNTNAP5 | hyper |
| COASY   | hypo  |
| COBL    | hyper |
| COBRA1  | hypo  |
| COL11A1 | hyper |
| COL18A1 | hyper |
| COL19A1 | hyper |
| COL1A2  | hyper |
| COL24A1 | hyper |
| COL25A1 | hyper |
| COL2A1  | hyper |
| COL4A2  | hyper |
| COL4A3  | hyper |
| COL5A2  | hypo  |
| COL5A3  | hyper |
| COL6A1  | hyper |
| COL7A1  | hypo  |
| COL9A2  | hypo  |
| COL9A3  | hyper |
| COLEC10 | hyper |
| COLEC11 | hypo  |
| COMMD3  | hyper |
| COMMD8  | hypo  |
| COMP    | hyper |
| COMTD1  | hypo  |
| COPB1   | hypo  |
| COPS3   | hyper |
| COPS4   | hyper |
| COPS6   | hypo  |
| COPZ1   | hypo  |
| COQ10B  | hypo  |
| COQ5    | hypo  |
| CORIN   | hyper |
| CORO1B  | hypo  |
| CORO1C  | hyper |
| CORO2B  | hypo  |
| CORO6   | hypo  |
| COTL1   | hyper |
| COX16   | hypo  |
| COX19   | hypo  |
| COX4NB  | hyper |
| COX5A   | hypo  |
| COX6A1  | hypo  |
| COX7B2  | hyper |
| CP110   | hyper |
| CPA2    | hyper |
| CPEB1   | hypo  |
| CPEB3   | hypo  |
| CPLX1   | hyper |
| CPLX4   | hypo  |
| CPNE6   | hyper |
| CPNE7   | hyper |

|            |       |
|------------|-------|
| CPNE8      | hyper |
| CPNE9      | hyper |
| CPOX       | hypo  |
| CPSF1      | hypo  |
| CPSF3      | hyper |
| CPSF4      | hyper |
| CPSF4L     | hypo  |
| CPVL       | hyper |
| CPZ        | hyper |
| CR2        | hypo  |
| CRABP1     | hyper |
| CRADD      | hypo  |
| CRB1       | hyper |
| CRB2       | hypo  |
| CREB1      | hypo  |
| CREB3L3    | hypo  |
| CREB5      | hypo  |
| CREBZF     | hypo  |
| CRELD2     | hyper |
| CREM       | hypo  |
| CRH        | hyper |
| CRHR1      | hypo  |
| CRIPT      | hypo  |
| CRISPLD2   | hyper |
| CRLF1      | hyper |
| CRLF3      | hypo  |
| CRLS1      | hypo  |
| CRTAC1     | hyper |
| CRTC3      | hypo  |
| CRY1       | hypo  |
| CRY2       | hyper |
| CRYBB2     | hyper |
| CRYBB3     | hyper |
| CRYGB      | hypo  |
| CRYL1      | hypo  |
| CS         | hypo  |
| CSAD       | hypo  |
| CSF3R      | hypo  |
| CSGALNACT1 | hyper |
| CSGALNACT2 | hypo  |
| CSMD1      | hypo  |
| CSNK1D     | hyper |
| CSNK1G1    | hypo  |
| CSNK1G3    | hypo  |
| CSNK2A1    | hyper |
| CSNK2A2    | hyper |
| CST8       | hypo  |
| CST9L      | hyper |
| CSTF1      | hyper |
| CTCFL      | hyper |
| CTDP1      | hyper |
| CTDSPL     | hyper |
| CTH        | hypo  |
| CTNNA1     | hypo  |
| CTNNA2     | hyper |
| CTNBL1     | hyper |
| CTNND2     | hypo  |
| CTPS       | hypo  |



|         |       |
|---------|-------|
| CTR9    | hypo  |
| CTRB1   | hypo  |
| CTSF    | hypo  |
| CTSG    | hyper |
| CTU1    | hyper |
| CUBN    | hyper |
| CUEDC1  | hyper |
| CUX2    | hypo  |
| CWF19L1 | hypo  |
| CX3CL1  | hyper |
| CXADR   | hyper |
| CXCL12  | hypo  |
| CXCR2   | hyper |
| CXXC1   | hypo  |
| CXXC5   | hyper |
| CYB5A   | hyper |
| CYB5R2  | hyper |
| CYBA    | hypo  |
| CYC1    | hyper |
| CYP11A1 | hypo  |
| CYP1A1  | hypo  |
| CYP1B1  | hypo  |
| CYP26A1 | hyper |
| CYP26C1 | hyper |
| CYP2J2  | hypo  |
| CYP46A1 | hypo  |
| CYP4F22 | hyper |
| CYP4V2  | hyper |
| CYSLTR2 | hyper |
| CYTH2   | hyper |
| CYTL1   | hyper |
| CYTSB   | hypo  |
| D4S234E | hyper |
| DAAM2   | hypo  |
| DAB1    | hypo  |
| DACH1   | hyper |
| DACT1   | hyper |
| DACT2   | hyper |
| DAGLB   | hyper |
| DAND5   | hypo  |
| DAO     | hypo  |
| DAP     | hyper |
| DAPK3   | hyper |
| DAPL1   | hypo  |
| DARS    | hypo  |
| DAZAP2  | hypo  |
| DBP     | hyper |
| DBX1    | hyper |
| DCAF12  | hypo  |
| DCAF17  | hypo  |
| DCAF7   | hyper |
| DCAKD   | hyper |
| DCC     | hyper |
| DCHS2   | hyper |
| DCLK1   | hyper |
| DCLK2   | hyper |
| DCLRE1C | hypo  |
| DCP1B   | hypo  |

|         |       |
|---------|-------|
| DCST1   | hyper |
| DCTN1   | hyper |
| DCTN4   | hypo  |
| DCUN1D5 | hypo  |
| DDC     | hypo  |
| DDHD1   | hypo  |
| DDIT4   | hypo  |
| DDIT4L  | hyper |
| DDN     | hyper |
| DDO     | hyper |
| DDX18   | hypo  |
| DDX20   | hyper |
| DDX21   | hypo  |
| DDX39   | hypo  |
| DDX43   | hyper |
| DDX46   | hyper |
| DDX60   | hypo  |
| DECR2   | hyper |
| DEDD2   | hypo  |
| DEFB121 | hypo  |
| DEGS2   | hypo  |
| DENND1B | hyper |
| DENND3  | hyper |
| DENND4B | hypo  |
| DENND5A | hypo  |
| DEPDC4  | hyper |
| DEPDC7  | hyper |
| DERA    | hypo  |
| DERL1   | hypo  |
| DET1    | hypo  |
| DFFB    | hypo  |
| DFNB31  | hyper |
| DGCR14  | hyper |
| DGCR2   | hyper |
| DGCR5   | hyper |
| DGCR6   | hypo  |
| DGKG    | hyper |
| DGKI    | hyper |
| DGKQ    | hypo  |
| DGKZ    | hyper |
| DHRS3   | hypo  |
| DHRS7   | hyper |
| DHX30   | hyper |
| DHX33   | hypo  |
| DHX38   | hyper |
| DHX40   | hyper |
| DHX9    | hypo  |
| DIAPH1  | hypo  |
| DICER1  | hyper |
| DIO1    | hyper |
| DIP2B   | hypo  |
| DIRAS2  | hyper |
| DIRC2   | hyper |
| DIRC3   | hypo  |
| DKK1    | hyper |
| DKK2    | hyper |
| DKK3    | hyper |
| DLC1    | hypo  |

|          |       |
|----------|-------|
| DLG1     | hypo  |
| DLG2     | hyper |
| DLGAP3   | hypo  |
| DLK1     | hyper |
| DLL3     | hyper |
| DLST     | hypo  |
| DLX1     | hyper |
| DLX4     | hyper |
| DLX6AS   | hyper |
| DMKN     | hypo  |
| DMP1     | hyper |
| DMPK     | hyper |
| DMRT2    | hyper |
| DMRTA2   | hyper |
| DMWD     | hyper |
| DNAH1    | hyper |
| DNAH5    | hypo  |
| DNAH8    | hyper |
| DNAH9    | hypo  |
| DNAJB13  | hypo  |
| DNAJB14  | hypo  |
| DNAJB6   | hyper |
| DNAJC10  | hyper |
| DNAJC13  | hyper |
| DNAJC15  | hyper |
| DNAJC2   | hyper |
| DNAJC27  | hypo  |
| DNAJC28  | hypo  |
| DNAJC3   | hypo  |
| DNAL4    | hyper |
| DNASE1L2 | hyper |
| DNER     | hyper |
| DNM3     | hyper |
| DNMT3A   | hypo  |
| DOCK3    | hypo  |
| DOK2     | hypo  |
| DOPEY1   | hypo  |
| DPCR1    | hypo  |
| DPEP1    | hypo  |
| DPF3     | hyper |
| DPP10    | hyper |
| DPP8     | hypo  |
| DPPA5    | hyper |
| DPY19L1  | hyper |
| DPYS     | hyper |
| DPYSL2   | hyper |
| DPYSL4   | hyper |
| DPYSL5   | hyper |
| DRD1     | hyper |
| DRD2     | hyper |
| DRD4     | hyper |
| DRG1     | hypo  |
| DSC2     | hyper |
| DSCAM    | hyper |
| DSCR6    | hyper |
| DSEL     | hyper |
| DSTYK    | hyper |
| DTNB     | hyper |

|          |       |
|----------|-------|
| DTX1     | hyper |
| DUOX1    | hyper |
| DUOX2    | hypo  |
| DUOXA2   | hyper |
| DUS3L    | hyper |
| DUSP11   | hyper |
| DUSP16   | hyper |
| DUSP27   | hypo  |
| DUSP5    | hypo  |
| DYNC1I2  | hypo  |
| DYNC1LI1 | hypo  |
| DYNC1LI2 | hypo  |
| DYNC2LI1 | hypo  |
| DYNLRB1  | hyper |
| DYNLT1   | hypo  |
| DYRK2    | hyper |
| DYSF     | hyper |
| DYX1C1   | hyper |
| DZIP1    | hypo  |
| DZIP1L   | hyper |
| E2F6     | hyper |
| E2F8     | hyper |
| E4F1     | hyper |
| EBAG9    | hypo  |
| EBF2     | hyper |
| EBPL     | hypo  |
| ECE1     | hyper |
| ECE2     | hyper |
| ECEL1    | hyper |
| ECH1     | hyper |
| ECHDC1   | hyper |
| ECHS1    | hypo  |
| ECM1     | hypo  |
| ECT2L    | hypo  |
| EDAR     | hypo  |
| EDARADD  | hyper |
| EDN1     | hyper |
| EDN2     | hypo  |
| EDN3     | hyper |
| EDNRB    | hyper |
| EEF1DP3  | hypo  |
| EEF2     | hypo  |
| EFCAB1   | hyper |
| EFCAB10  | hyper |
| EFCAB4A  | hyper |
| EFCAB5   | hyper |
| EFCAB6   | hypo  |
| EFEMP1   | hyper |
| EFHB     | hypo  |
| EFNA2    | hypo  |
| EFNA3    | hyper |
| EFNA4    | hypo  |
| EFNB2    | hypo  |
| EGFL8    | hyper |
| EGFLAM   | hypo  |
| EGFR     | hyper |
| EGLN3    | hyper |
| EGR3     | hyper |

|           |       |
|-----------|-------|
| EHBP1     | hypo  |
| EHBP1L1   | hyper |
| EHD1      | hypo  |
| EHD4      | hyper |
| EHMT1     | hyper |
| EHMT2     | hyper |
| EIF2AK3   | hypo  |
| EIF2B5    | hypo  |
| EIF2C1    | hypo  |
| EIF2C2    | hyper |
| EIF2C4    | hypo  |
| EIF4E     | hypo  |
| EIF4E1B   | hyper |
| EIF4ENIF1 | hyper |
| EIF4G3    | hyper |
| EIF5A     | hyper |
| EIF5A2    | hyper |
| ELAVL3    | hyper |
| ELF1      | hyper |
| ELFN2     | hypo  |
| ELOVL5    | hyper |
| ELP3      | hypo  |
| ELTD1     | hyper |
| EMB       | hypo  |
| EMID2     | hypo  |
| EMILIN2   | hypo  |
| EMILIN3   | hyper |
| EML4      | hyper |
| EMR1      | hyper |
| EMX1      | hypo  |
| EMX2      | hyper |
| EN2       | hyper |
| ENHO      | hypo  |
| ENOX1     | hypo  |
| ENTPD4    | hypo  |
| ENTPD6    | hyper |
| EOMES     | hypo  |
| EP400     | hypo  |
| EP400NL   | hyper |
| EPB41L4B  | hypo  |
| EPHA10    | hyper |
| EPHA4     | hypo  |
| EPHA5     | hyper |
| EPHA8     | hypo  |
| EPHB2     | hypo  |
| EPS15     | hypo  |
| EPX       | hypo  |
| ERC1      | hyper |
| ERC2      | hypo  |
| ERCC2     | hyper |
| ERCC5     | hypo  |
| ERCC6     | hypo  |
| ERGIC1    | hypo  |
| ERGIC2    | hypo  |
| ERI1      | hypo  |
| ERI2      | hyper |
| ERMAP     | hypo  |
| ERN2      | hyper |

|          |       |
|----------|-------|
| ESAM     | hyper |
| ESRRB    | hypo  |
| ESRRG    | hyper |
| ESYT2    | hypo  |
| ESYT3    | hyper |
| ETNK1    | hyper |
| ETS1     | hypo  |
| ETV1     | hyper |
| ETV4     | hypo  |
| ETV6     | hyper |
| ETV7     | hypo  |
| EVI5L    | hypo  |
| EVX1     | hyper |
| EVX2     | hyper |
| EWSR1    | hypo  |
| EXD2     | hypo  |
| EXD3     | hyper |
| EXO1     | hypo  |
| EXOC3    | hyper |
| EXOC3L2  | hypo  |
| EXOC6B   | hyper |
| EXOSC10  | hypo  |
| EXTL3    | hyper |
| EYS      | hypo  |
| EZR      | hypo  |
| F2RL3    | hypo  |
| FA2H     | hyper |
| FAF2     | hypo  |
| FAIM     | hypo  |
| FAM101B  | hyper |
| FAM110C  | hyper |
| FAM111A  | hypo  |
| FAM111B  | hypo  |
| FAM113A  | hypo  |
| FAM114A2 | hyper |
| FAM116A  | hypo  |
| FAM117B  | hyper |
| FAM118B  | hyper |
| FAM120B  | hyper |
| FAM123A  | hyper |
| FAM123C  | hyper |
| FAM124A  | hyper |
| FAM129B  | hyper |
| FAM13A   | hyper |
| FAM13AOS | hyper |
| FAM149A  | hypo  |
| FAM150A  | hypo  |
| FAM161A  | hypo  |
| FAM163A  | hypo  |
| FAM166B  | hypo  |
| FAM168A  | hyper |
| FAM168B  | hypo  |
| FAM172A  | hypo  |
| FAM173B  | hypo  |
| FAM176A  | hypo  |
| FAM176B  | hyper |
| FAM178A  | hypo  |
| FAM181B  | hyper |

|          |       |
|----------|-------|
| FAM184A  | hyper |
| FAM184B  | hyper |
| FAM188B  | hypo  |
| FAM189A1 | hypo  |
| FAM192A  | hypo  |
| FAM196A  | hyper |
| FAM196B  | hypo  |
| FAM19A2  | hypo  |
| FAM19A5  | hypo  |
| FAM20C   | hypo  |
| FAM26F   | hypo  |
| FAM38A   | hypo  |
| FAM38B   | hypo  |
| FAM40A   | hyper |
| FAM46B   | hypo  |
| FAM49A   | hyper |
| FAM53A   | hyper |
| FAM59A   | hypo  |
| FAM5B    | hyper |
| FAM5C    | hyper |
| FAM60A   | hypo  |
| FAM63A   | hyper |
| FAM64A   | hyper |
| FAM65A   | hypo  |
| FAM65B   | hyper |
| FAM71E2  | hypo  |
| FAM76A   | hyper |
| FAM76B   | hypo  |
| FAM82A2  | hypo  |
| FAM83A   | hyper |
| FAM83E   | hypo  |
| FAM84B   | hyper |
| FAM8A1   | hyper |
| FAM91A1  | hypo  |
| FAM92A1  | hyper |
| FAM96B   | hypo  |
| FAM98A   | hypo  |
| FAM98C   | hypo  |
| FANCC    | hypo  |
| FANCF    | hypo  |
| FARP1    | hyper |
| FARS2    | hypo  |
| FARSA    | hypo  |
| FARSB    | hypo  |
| FASLG    | hypo  |
| FASN     | hyper |
| FAT1     | hyper |
| FAU      | hyper |
| FBLL1    | hyper |
| FBP1     | hyper |
| FBXL15   | hyper |
| FBXL16   | hyper |
| FBXL17   | hypo  |
| FBXL19   | hyper |
| FBXL21   | hyper |
| FBXL22   | hypo  |
| FBXL4    | hyper |
| FBXL6    | hyper |

|          |       |
|----------|-------|
| FBXL7    | hyper |
| FBXO18   | hyper |
| FBXO22OS | hypo  |
| FBXO3    | hypo  |
| FBXO31   | hyper |
| FBXO34   | hyper |
| FBXO39   | hyper |
| FBXO41   | hyper |
| FBXO46   | hyper |
| FBXO7    | hypo  |
| FBXW8    | hypo  |
| FCGBP    | hyper |
| FCGR3A   | hyper |
| FCHO1    | hypo  |
| FCN1     | hyper |
| FCN3     | hyper |
| FCRL1    | hypo  |
| FCRL6    | hypo  |
| FCRLA    | hypo  |
| FDFT1    | hypo  |
| FDPS     | hyper |
| FERD3L   | hyper |
| FERMT3   | hyper |
| FEV      | hypo  |
| FEZ1     | hyper |
| FEZ2     | hyper |
| FGA      | hypo  |
| FGF1     | hypo  |
| FGF12    | hyper |
| FGF18    | hypo  |
| FGF19    | hyper |
| FGF3     | hyper |
| FGF9     | hypo  |
| FGFR3    | hyper |
| FGR      | hyper |
| FHDC1    | hyper |
| FHOD3    | hypo  |
| FIBCD1   | hypo  |
| FIBIN    | hyper |
| FIG4     | hyper |
| FIGLA    | hyper |
| FIGN     | hypo  |
| FIGNL2   | hyper |
| FILIP1   | hyper |
| FIS1     | hyper |
| FKBP14   | hypo  |
| FKBP2    | hypo  |
| FKBP5    | hyper |
| FKBP9    | hypo  |
| FKSG83   | hyper |
| FLI1     | hypo  |
| FLII     | hyper |
| FLJ10357 | hyper |
| FLJ13197 | hyper |
| FLJ20184 | hypo  |
| FLJ23834 | hyper |
| FLJ26850 | hyper |
| FLJ36000 | hyper |



|          |       |
|----------|-------|
| FLJ36031 | hypo  |
| FLJ37453 | hypo  |
| FLJ39582 | hypo  |
| FLJ42289 | hypo  |
| FLJ42875 | hyper |
| FLJ43663 | hypo  |
| FLJ45983 | hypo  |
| FLJ90757 | hyper |
| FLNB     | hypo  |
| FLNC     | hypo  |
| FLOT1    | hypo  |
| FLRT2    | hyper |
| FLT1     | hyper |
| FLT4     | hyper |
| FLVCR2   | hypo  |
| FMNL2    | hypo  |
| FMO1     | hypo  |
| FNBP1L   | hyper |
| FNTB     | hypo  |
| FOLR4    | hyper |
| FOXA3    | hyper |
| FOXB1    | hypo  |
| FOXC1    | hyper |
| FOXI1    | hypo  |
| FOXK1    | hyper |
| FOXK2    | hypo  |
| FOXL1    | hypo  |
| FOXM1    | hypo  |
| FOXN4    | hypo  |
| FOXP1    | hypo  |
| FOXP4    | hypo  |
| FOXQ1    | hyper |
| FPR3     | hyper |
| FRAS1    | hyper |
| FREM1    | hypo  |
| FREM3    | hypo  |
| FREQ     | hypo  |
| FRG1     | hyper |
| FRMD4A   | hyper |
| FSCN1    | hypo  |
| FSCN2    | hyper |
| FSD1     | hyper |
| FSHR     | hyper |
| FSIP1    | hypo  |
| FSTL1    | hyper |
| FSTL5    | hyper |
| FTCD     | hypo  |
| FUBP1    | hyper |
| FUT5     | hypo  |
| FXR2     | hyper |
| FXYD4    | hypo  |
| FYN      | hyper |
| FYTTD1   | hyper |
| FZD1     | hypo  |
| FZD10    | hyper |
| FZD6     | hyper |
| G6PC     | hyper |
| G6PC3    | hypo  |

|           |       |
|-----------|-------|
| GAB2      | hypo  |
| GABARAPL1 | hypo  |
| GABARAPL2 | hyper |
| GABRA2    | hyper |
| GABRB1    | hypo  |
| GABRB2    | hyper |
| GABRD     | hyper |
| GABRG2    | hyper |
| GADD45B   | hypo  |
| GALK2     | hypo  |
| GALNS     | hypo  |
| GALNT10   | hyper |
| GALNT11   | hypo  |
| GALNT9    | hyper |
| GALNTL5   | hyper |
| GALR2     | hyper |
| GAP43     | hypo  |
| GAPDH     | hypo  |
| GAR1      | hypo  |
| GARS      | hyper |
| GAS2L1    | hyper |
| GAS7      | hypo  |
| GAS8      | hyper |
| GATA2     | hyper |
| GATA4     | hyper |
| GATA6     | hyper |
| GBAP1     | hypo  |
| GBAS      | hypo  |
| GBGT1     | hyper |
| GBX1      | hyper |
| GC        | hypo  |
| GCA       | hyper |
| GCH1      | hypo  |
| GCKR      | hyper |
| GCLM      | hypo  |
| GCM1      | hypo  |
| GCM2      | hyper |
| GCOM1     | hyper |
| GDAP1     | hyper |
| GDF2      | hypo  |
| GDF6      | hyper |
| GEFT      | hyper |
| GEMIN7    | hyper |
| GFI1      | hypo  |
| GFOD1     | hypo  |
| GFOD2     | hypo  |
| GFPT2     | hypo  |
| GFRA2     | hyper |
| GGA3      | hypo  |
| GGPS1     | hypo  |
| GGT1      | hypo  |
| GGTA1     | hyper |
| GHR       | hyper |
| GHRHR     | hypo  |
| GHRLOS    | hyper |
| GHSR      | hyper |
| GIMAP8    | hyper |
| GIPC1     | hypo  |

|          |       |
|----------|-------|
| GIPC2    | hyper |
| GJA3     | hypo  |
| GJA5     | hyper |
| GJB2     | hypo  |
| GJD2     | hyper |
| GJD3     | hyper |
| GLB1L2   | hypo  |
| GLG1     | hypo  |
| GLI1     | hypo  |
| GLI3     | hypo  |
| GLI4     | hypo  |
| GLIPR1L2 | hyper |
| GLRA1    | hyper |
| GLRA3    | hypo  |
| GLRB     | hyper |
| GLRX3    | hypo  |
| GLT1D1   | hyper |
| GLT25D2  | hypo  |
| GLYCTK   | hypo  |
| GM2A     | hypo  |
| GMDS     | hyper |
| GMEB2    | hyper |
| GMPPB    | hyper |
| GNA12    | hypo  |
| GNAI2    | hypo  |
| GNAI3    | hypo  |
| GNAO1    | hyper |
| GNAQ     | hypo  |
| GNAS     | hyper |
| GNASAS   | hypo  |
| GNB1     | hyper |
| GNB1L    | hypo  |
| GNG12    | hypo  |
| GNG4     | hyper |
| GNG7     | hyper |
| GNL1     | hyper |
| GNL3     | hyper |
| GNPDA2   | hyper |
| GNRH2    | hypo  |
| GNS      | hyper |
| GOLPH3   | hyper |
| GOLSYN   | hypo  |
| GON4L    | hyper |
| GOPC     | hypo  |
| GPAM     | hyper |
| GPATCH2  | hyper |
| GPATCH8  | hyper |
| GPC5     | hyper |
| GPC6     | hyper |
| GPI      | hyper |
| GPR107   | hyper |
| GPR124   | hyper |
| GPR126   | hyper |
| GPR132   | hyper |
| GPR156   | hypo  |
| GPR158   | hypo  |
| GPR161   | hypo  |
| GPR176   | hypo  |

|         |       |
|---------|-------|
| GPR177  | hypo  |
| GPR180  | hypo  |
| GPR19   | hypo  |
| GPR20   | hyper |
| GPR39   | hyper |
| GPR4    | hyper |
| GPR6    | hyper |
| GPR61   | hypo  |
| GPR62   | hypo  |
| GPR83   | hyper |
| GPR88   | hyper |
| GPX2    | hyper |
| GPX5    | hypo  |
| GPX6    | hyper |
| GPX7    | hyper |
| GRAMD1B | hyper |
| GRAMD2  | hyper |
| GRB10   | hyper |
| GRB2    | hypo  |
| GREB1   | hyper |
| GREM2   | hyper |
| GRHL2   | hypo  |
| GRID1   | hyper |
| GRID2IP | hyper |
| GRIK2   | hyper |
| GRIN2C  | hyper |
| GRIN2D  | hyper |
| GRIP1   | hypo  |
| GRIP2   | hypo  |
| GRK1    | hypo  |
| GRM1    | hyper |
| GRM4    | hyper |
| GRM5    | hyper |
| GRM6    | hyper |
| GRP     | hyper |
| GRPEL1  | hyper |
| GRRP1   | hyper |
| GRXCR1  | hypo  |
| GSC     | hyper |
| GSDMA   | hypo  |
| GSG1L   | hyper |
| GSK3A   | hyper |
| GSTP1   | hyper |
| GSTZ1   | hyper |
| GTF2A2  | hyper |
| GTF2E1  | hypo  |
| GTF3C4  | hypo  |
| GTF3C6  | hypo  |
| GTPBP8  | hypo  |
| GTSF1L  | hypo  |
| GUCA2B  | hypo  |
| GUCY1A2 | hyper |
| GUCY1B3 | hyper |
| GUK1    | hypo  |
| GYG1    | hypo  |
| GYPE    | hyper |
| GZMM    | hyper |
| H19     | hyper |

|            |       |
|------------|-------|
| H1FOO      | hypo  |
| H2AFV      | hypo  |
| H2AFY      | hypo  |
| H2AFY2     | hyper |
| HAGH       | hyper |
| HAND1      | hyper |
| HAND2      | hyper |
| HAPLN3     | hypo  |
| HAS2AS     | hyper |
| HAUS2      | hyper |
| HBEGF      | hypo  |
| HBII-52-45 | hyper |
| HBZ        | hypo  |
| HCCA2      | hypo  |
| HCG11      | hypo  |
| HCG22      | hyper |
| HCG27      | hyper |
| HCN2       | hyper |
| HCN4       | hyper |
| HDAC10     | hypo  |
| HDAC11     | hypo  |
| HDAC5      | hyper |
| HDAC9      | hyper |
| HDDC3      | hypo  |
| HDGF2      | hyper |
| HDLBP      | hypo  |
| HEATR2     | hyper |
| HELT       | hyper |
| HEPHL1     | hyper |
| HEPN1      | hyper |
| HERC2      | hyper |
| HERPUD1    | hyper |
| HES2       | hyper |
| HES4       | hypo  |
| HFM1       | hyper |
| HGC6.3     | hyper |
| HGFAC      | hypo  |
| HHAT       | hyper |
| HHIPL1     | hyper |
| HHIPL2     | hyper |
| HIAT1      | hypo  |
| HIF3A      | hyper |
| HIGD2A     | hypo  |
| HINFP      | hypo  |
| HINT1      | hypo  |
| HIP1       | hyper |
| HIPK2      | hyper |
| HIPK4      | hypo  |
| HIST1H2AI  | hypo  |
| HIST1H2BE  | hyper |
| HIST1H2BK  | hypo  |
| HIST1H3H   | hypo  |
| HIST1H4E   | hypo  |
| HIST2H2AA3 | hypo  |
| HIST2H2AC  | hypo  |
| HIST3H3    | hyper |
| HIVEP2     | hyper |
| HK1        | hypo  |

|          |       |
|----------|-------|
| HLA-DOA  | hyper |
| HLA-DOB  | hypo  |
| HLA-DPA1 | hyper |
| HLA-DPB1 | hyper |
| HLA-DRA  | hypo  |
| HLA-DRB1 | hypo  |
| HLA-DRB5 | hyper |
| HLA-F    | hypo  |
| HLA-G    | hyper |
| HLA-J    | hypo  |
| HLF      | hyper |
| HLTF     | hyper |
| HMGA2    | hyper |
| HMGCLL1  | hyper |
| HMGXB3   | hyper |
| HMSD     | hypo  |
| HMX2     | hyper |
| HNF1B    | hyper |
| HNF4A    | hypo  |
| HNRNPA1  | hypo  |
| HNRNPF   | hyper |
| HNRNPL   | hypo  |
| HNRNPR   | hypo  |
| HNRNPUL1 | hyper |
| HNRNPUL2 | hypo  |
| HOMER1   | hypo  |
| HOOK1    | hypo  |
| HOOK2    | hypo  |
| HOPX     | hyper |
| HOXA10   | hyper |
| HOXA11AS | hyper |
| HOXA13   | hyper |
| HOXA2    | hypo  |
| HOXA3    | hyper |
| HOXA4    | hyper |
| HOXA5    | hyper |
| HOXA6    | hyper |
| HOXA7    | hyper |
| HOXA9    | hyper |
| HOXC10   | hypo  |
| HOXC11   | hyper |
| HOXC12   | hyper |
| HOXC13   | hyper |
| HOXC8    | hypo  |
| HOXD11   | hyper |
| HOXD12   | hyper |
| HPCAL4   | hyper |
| HPGD     | hypo  |
| HPS3     | hypo  |
| HPS4     | hyper |
| HPSE2    | hyper |
| HRG      | hyper |
| HRH1     | hyper |
| HRH3     | hyper |
| HRK      | hypo  |
| HS3ST1   | hyper |
| HS3ST2   | hyper |
| HS3ST6   | hypo  |

|          |       |
|----------|-------|
| HSCB     | hypo  |
| HSD17B12 | hypo  |
| HSD17B2  | hyper |
| HSD17B4  | hyper |
| HSDL2    | hypo  |
| HSF5     | hyper |
| HSPA1B   | hypo  |
| HSPB8    | hypo  |
| HSPC072  | hyper |
| HSPG2    | hypo  |
| HTA      | hypo  |
| HTR1A    | hyper |
| HTR2A    | hypo  |
| HTR3A    | hypo  |
| HTRA1    | hyper |
| HTRA2    | hypo  |
| HTT      | hypo  |
| HYAL2    | hypo  |
| HYDIN    | hypo  |
| HYI      | hyper |
| HYLS1    | hyper |
| IAH1     | hyper |
| ICA1L    | hypo  |
| ICAM1    | hypo  |
| ID3      | hypo  |
| IDO2     | hypo  |
| IER3     | hypo  |
| IFFO2    | hyper |
| IFI27    | hypo  |
| IFI30    | hyper |
| IFNGR2   | hyper |
| IFT140   | hypo  |
| IFT52    | hypo  |
| IFT88    | hyper |
| IGDCC3   | hyper |
| IGDCC4   | hypo  |
| IGF1     | hyper |
| IGF1R    | hyper |
| IGF2AS   | hyper |
| IGF2BP2  | hyper |
| IGF2R    | hyper |
| IGFBP3   | hyper |
| IGFBP4   | hypo  |
| IGFBP5   | hyper |
| IGFBP7   | hyper |
| IGFBPL1  | hypo  |
| IGLON5   | hyper |
| IGSF10   | hyper |
| IGSF21   | hyper |
| IGSF22   | hyper |
| IGSF8    | hyper |
| IGSF9    | hyper |
| IGSF9B   | hypo  |
| IHH      | hypo  |
| IKZF1    | hypo  |
| IL16     | hyper |
| IL17RA   | hyper |
| IL17RD   | hyper |

|          |       |
|----------|-------|
| IL17REL  | hyper |
| IL19     | hypo  |
| IL1B     | hyper |
| IL1RAP   | hypo  |
| IL21R    | hypo  |
| IL27     | hypo  |
| IL6R     | hyper |
| IL7      | hyper |
| ILF3     | hyper |
| ILVBL    | hyper |
| IMMP2L   | hypo  |
| IMP3     | hypo  |
| IMPACT   | hyper |
| IMPG1    | hyper |
| INA      | hyper |
| INADL    | hypo  |
| INCENP   | hypo  |
| INF2     | hypo  |
| ING1     | hypo  |
| ING2     | hypo  |
| INHBB    | hyper |
| INHBE    | hypo  |
| INO80    | hypo  |
| INO80D   | hyper |
| INPP4A   | hyper |
| INPP4B   | hypo  |
| INPP5A   | hyper |
| INSL6    | hyper |
| INSR     | hypo  |
| INTS1    | hyper |
| INTS12   | hyper |
| IPPK     | hypo  |
| IQCA1    | hypo  |
| IQCB1    | hypo  |
| IQCD     | hypo  |
| IQCE     | hypo  |
| IQCJ     | hypo  |
| IQCK     | hyper |
| IQGAP2   | hyper |
| IQSEC1   | hyper |
| IRAK1BP1 | hypo  |
| IRAK2    | hypo  |
| IRF2BP2  | hypo  |
| IRF5     | hyper |
| IRF8     | hypo  |
| IRS1     | hypo  |
| IRS2     | hyper |
| IRX4     | hyper |
| ISG20L2  | hypo  |
| ISLR2    | hyper |
| ISOC2    | hypo  |
| ISPD     | hyper |
| ISY1     | hypo  |
| ITCH     | hyper |
| ITGA1    | hypo  |
| ITGA2    | hypo  |
| ITGA2B   | hyper |
| ITGA8    | hyper |



|          |       |
|----------|-------|
| ITGB1BP1 | hyper |
| ITGB4    | hyper |
| ITGBL1   | hyper |
| ITIH5    | hyper |
| ITPA     | hyper |
| ITPK1    | hypo  |
| ITPKB    | hypo  |
| ITPR1    | hypo  |
| ITPR2    | hyper |
| ITPRIP   | hyper |
| ITSN1    | hypo  |
| ITSN2    | hyper |
| JAG1     | hyper |
| JAG2     | hypo  |
| JAGN1    | hypo  |
| JAK3     | hypo  |
| JAM3     | hyper |
| JARID2   | hyper |
| JMJD1C   | hyper |
| JMJD6    | hypo  |
| JPH2     | hyper |
| JRK      | hyper |
| JUP      | hypo  |
| KAT5     | hypo  |
| KATNAL2  | hyper |
| KAZALD1  | hyper |
| KBTBD12  | hypo  |
| KBTBD8   | hypo  |
| KCNAB1   | hypo  |
| KCNC1    | hyper |
| KCNC2    | hyper |
| KCND3    | hyper |
| KCNF1    | hyper |
| KCNG2    | hyper |
| KCNH2    | hypo  |
| KCNH3    | hyper |
| KCNH5    | hyper |
| KCNH8    | hyper |
| KCNIP1   | hyper |
| KCNJ15   | hyper |
| KCNJ6    | hypo  |
| KCNK10   | hypo  |
| KCNK12   | hyper |
| KCNK13   | hyper |
| KCNK15   | hyper |
| KCNK2    | hyper |
| KCNK3    | hyper |
| KCNK7    | hyper |
| KCNMA1   | hyper |
| KCNMB3   | hypo  |
| KCNMB4   | hyper |
| KCNQ1OT1 | hyper |
| KCNQ2    | hyper |
| KCNS1    | hyper |
| KCNT1    | hypo  |
| KCTD1    | hypo  |
| KCTD11   | hyper |
| KCTD12   | hyper |

|           |       |
|-----------|-------|
| KCTD2     | hyper |
| KDEL2     | hypo  |
| KDEL3     | hyper |
| KDM4A     | hyper |
| KDR       | hyper |
| KHDRBS1   | hypo  |
| KHDRBS3   | hypo  |
| KHNYN     | hyper |
| KIAA0090  | hypo  |
| KIAA0146  | hyper |
| KIAA0182  | hyper |
| KIAA0196  | hypo  |
| KIAA0232  | hyper |
| KIAA0317  | hyper |
| KIAA0415  | hyper |
| KIAA0556  | hyper |
| KIAA0562  | hyper |
| KIAA0649  | hyper |
| KIAA0754  | hyper |
| KIAA0776  | hypo  |
| KIAA0831  | hyper |
| KIAA0895L | hyper |
| KIAA0907  | hyper |
| KIAA1024  | hyper |
| KIAA1033  | hypo  |
| KIAA1045  | hypo  |
| KIAA1109  | hypo  |
| KIAA1161  | hyper |
| KIAA1191  | hyper |
| KIAA1274  | hypo  |
| KIAA1328  | hypo  |
| KIAA1383  | hyper |
| KIAA1409  | hypo  |
| KIAA1462  | hypo  |
| KIAA1467  | hypo  |
| KIAA1522  | hyper |
| KIAA1549  | hyper |
| KIAA1598  | hyper |
| KIAA1644  | hyper |
| KIAA1688  | hypo  |
| KIAA1751  | hypo  |
| KIAA1755  | hyper |
| KIAA1804  | hypo  |
| KIAA1984  | hyper |
| KIF12     | hypo  |
| KIF15     | hypo  |
| KIF19     | hyper |
| KIF1A     | hyper |
| KIF1B     | hypo  |
| KIF23     | hypo  |
| KIF25     | hyper |
| KIF3A     | hypo  |
| KIF9      | hypo  |
| KIR2DL4   | hypo  |
| KIR3DL1   | hypo  |
| KIR3DL3   | hypo  |
| KIRREL    | hypo  |
| KIRREL3   | hyper |

|           |       |
|-----------|-------|
| KISS1     | hyper |
| KIT       | hyper |
| KLC1      | hyper |
| KLC2      | hypo  |
| KLC3      | hyper |
| KLC4      | hypo  |
| KLF1      | hyper |
| KLF13     | hyper |
| KLF6      | hypo  |
| KLF7      | hyper |
| KLHDC8A   | hypo  |
| KLHL1     | hyper |
| KLHL14    | hyper |
| KLHL2     | hyper |
| KLHL30    | hyper |
| KLHL31    | hyper |
| KLHL32    | hyper |
| KLHL35    | hyper |
| KLHL36    | hyper |
| KLHL38    | hypo  |
| KLHL6     | hypo  |
| KLK10     | hyper |
| KLK11     | hypo  |
| KLK15     | hypo  |
| KLRAQ1    | hypo  |
| KNG1      | hypo  |
| KPNA1     | hyper |
| KPTN      | hypo  |
| KRCC1     | hypo  |
| KREMEN2   | hyper |
| KRIT1     | hypo  |
| KRR1      | hypo  |
| KRT1      | hypo  |
| KRT33A    | hyper |
| KRT5      | hypo  |
| KRT6B     | hypo  |
| KRT6C     | hypo  |
| KRT7      | hyper |
| KRT73     | hypo  |
| KRT74     | hypo  |
| KRT78     | hypo  |
| KRT83     | hypo  |
| KRT85     | hyper |
| KRTAP20-1 | hypo  |
| KRTAP2-1  | hypo  |
| KRTAP26-1 | hyper |
| KRTAP3-1  | hypo  |
| KRTAP4-5  | hypo  |
| L3MBTL2   | hypo  |
| L3MBTL3   | hypo  |
| LAMB1     | hyper |
| LAMB3     | hyper |
| LAMC1     | hypo  |
| LAMC3     | hyper |
| LAP3      | hypo  |
| LAPTM4A   | hyper |
| LARP1     | hyper |
| LASS3     | hyper |

|              |       |
|--------------|-------|
| LASS5        | hyper |
| LATS2        | hyper |
| LBXCOR1      | hypo  |
| LCLAT1       | hyper |
| LCN10        | hypo  |
| LCN6         | hypo  |
| LCN9         | hypo  |
| LCP2         | hyper |
| LDB2         | hypo  |
| LDHA         | hypo  |
| LDHAL6A      | hyper |
| LDHD         | hypo  |
| LDLR         | hypo  |
| LDLRAD3      | hyper |
| LEKR1        | hypo  |
| LEO1         | hypo  |
| LEP          | hyper |
| LEPRE1       | hyper |
| LEPREL1      | hyper |
| LETM1        | hyper |
| LETM2        | hypo  |
| LGALS3       | hypo  |
| LGALS3BP     | hypo  |
| LGI1         | hyper |
| LGI3         | hypo  |
| LGR5         | hyper |
| LHFPL4       | hyper |
| LHX1         | hyper |
| LHX2         | hyper |
| LHX4         | hyper |
| LHX5         | hyper |
| LHX8         | hyper |
| LHX9         | hyper |
| LIAS         | hypo  |
| LILRB1       | hypo  |
| LIMCH1       | hypo  |
| LIMK1        | hypo  |
| LIMK2        | hyper |
| LIN7B        | hypo  |
| LINGO1       | hypo  |
| LINGO3       | hyper |
| LIPC         | hypo  |
| LIPG         | hypo  |
| LMAN1L       | hyper |
| LMBR1        | hypo  |
| LMF1         | hyper |
| LMLN         | hypo  |
| LMO7         | hypo  |
| LMOD2        | hypo  |
| LMTK2        | hypo  |
| LMTK3        | hypo  |
| LMX1A        | hyper |
| LNP1         | hyper |
| LNPEP        | hyper |
| LOC100128023 | hyper |
| LOC100128554 | hyper |
| LOC100128788 | hypo  |
| LOC100130274 | hyper |

LOC100130522 hyper  
LOC100130776 hyper  
LOC100130872 hyper  
LOC100132215 hyper  
LOC100133091 hypo  
LOC100133991 hyper  
LOC100134713 hypo  
LOC100268168 hyper  
LOC100288797 hypo  
LOC100302652 hypo  
LOC100329108 hypo  
LOC115110 hyper  
LOC116437 hypo  
LOC145814 hypo  
LOC146336 hyper  
LOC149620 hypo  
LOC150381 hypo  
LOC151174 hypo  
LOC151534 hyper  
LOC254312 hyper  
LOC257358 hyper  
LOC282997 hypo  
LOC284412 hyper  
LOC284688 hyper  
LOC284805 hyper  
LOC285375 hypo  
LOC285419 hypo  
LOC285501 hyper  
LOC285548 hyper  
LOC285550 hypo  
LOC285780 hyper  
LOC387647 hyper  
LOC387763 hypo  
LOC388428 hyper  
LOC388796 hypo  
LOC388946 hyper  
LOC389033 hyper  
LOC390595 hyper  
LOC391322 hypo  
LOC400752 hyper  
LOC400940 hypo  
LOC401052 hypo  
LOC441601 hyper  
LOC441666 hyper  
LOC441897 hyper  
LOC554202 hyper  
LOC619207 hypo  
LOC641518 hypo  
LOC642006 hypo  
LOC643406 hypo  
LOC645323 hyper  
LOC648691 hypo  
LOC728024 hyper  
LOC728392 hyper  
LOC729176 hyper  
LOC729991-ME hypo  
LOC732275 hyper  
LOR hyper

|         |       |
|---------|-------|
| LOXL2   | hyper |
| LPCAT2  | hyper |
| LPIN1   | hyper |
| LPIN2   | hyper |
| LPIN3   | hypo  |
| LPP     | hyper |
| LRCH1   | hyper |
| LRDD    | hyper |
| LRFN5   | hyper |
| LRIG1   | hyper |
| LRIT1   | hypo  |
| LRP1    | hyper |
| LRP10   | hyper |
| LRP2    | hyper |
| LRRC10  | hypo  |
| LRRC10B | hyper |
| LRRC14  | hypo  |
| LRRC14B | hyper |
| LRRC15  | hypo  |
| LRRC2   | hypo  |
| LRRC20  | hyper |
| LRRC23  | hypo  |
| LRRC27  | hyper |
| LRRC33  | hypo  |
| LRRC43  | hyper |
| LRRC48  | hypo  |
| LRRC4B  | hypo  |
| LRRC56  | hypo  |
| LRRC8C  | hypo  |
| LRRCC1  | hypo  |
| LRRFIP2 | hypo  |
| LRRIQ4  | hyper |
| LRRN2   | hypo  |
| LRTM2   | hyper |
| LSG1    | hypo  |
| LSM5    | hyper |
| LSR     | hypo  |
| LTBP1   | hyper |
| LTBP2   | hyper |
| LTBP4   | hypo  |
| LUC7L2  | hyper |
| LUC7L3  | hypo  |
| LY6E    | hypo  |
| LY6G5C  | hypo  |
| LY6G6C  | hypo  |
| LY6G6D  | hypo  |
| LY6G6F  | hypo  |
| LY6K    | hyper |
| LY9     | hypo  |
| LYPD4   | hyper |
| LYPD6B  | hyper |
| LYPLA2  | hyper |
| LYRM2   | hyper |
| LYST    | hyper |
| LYZ     | hyper |
| LZTS1   | hyper |
| MACF1   | hyper |
| MACROD1 | hyper |

|           |       |
|-----------|-------|
| MACROD2   | hyper |
| MAD2L1    | hypo  |
| MAD2L1BP  | hypo  |
| MADCAM1   | hyper |
| MAEA      | hypo  |
| MAFB      | hyper |
| MAGEF1    | hyper |
| MAGEL2    | hyper |
| MAGI2     | hypo  |
| MAGI3     | hypo  |
| MAGOH     | hypo  |
| MALT1     | hypo  |
| MAML3     | hyper |
| MAMSTR    | hypo  |
| MAN2A1    | hyper |
| MAN2B1    | hypo  |
| MANBA     | hypo  |
| MAP1D     | hyper |
| MAP1LC3A  | hypo  |
| MAP2      | hyper |
| MAP2K3    | hypo  |
| MAP2K4    | hyper |
| MAP2K5    | hyper |
| MAP2K7    | hypo  |
| MAP3K1    | hypo  |
| MAP3K11   | hypo  |
| MAP3K12   | hyper |
| MAP3K5    | hypo  |
| MAP3K7    | hypo  |
| MAP3K7IP1 | hypo  |
| MAP3K7IP2 | hyper |
| MAP4K4    | hyper |
| MAP6D1    | hyper |
| MAPK12    | hypo  |
| MAPK14    | hypo  |
| MAPK8     | hyper |
| MARCO     | hyper |
| MARK4     | hyper |
| MARS2     | hypo  |
| MASP2     | hypo  |
| MAST1     | hyper |
| MAST3     | hyper |
| MAST4     | hypo  |
| MATK      | hypo  |
| MATR3     | hyper |
| MAZ       | hypo  |
| MB        | hypo  |
| MBD3L1    | hypo  |
| MBD6      | hyper |
| MBIP      | hypo  |
| MBNL2     | hyper |
| MBP       | hyper |
| MC1R      | hyper |
| MCF2L2    | hypo  |
| MCFD2     | hypo  |
| MCL1      | hyper |
| MCM10     | hyper |
| MCM7      | hypo  |

|           |       |
|-----------|-------|
| MCM8      | hypo  |
| MCOLN1    | hypo  |
| MCOLN3    | hypo  |
| MCPH1     | hyper |
| MDH1B     | hyper |
| MDM1      | hypo  |
| MEAF6     | hypo  |
| MECOM     | hyper |
| MED1      | hypo  |
| MED12L    | hyper |
| MED18     | hypo  |
| MED19     | hypo  |
| MED20     | hypo  |
| MED24     | hyper |
| MED28     | hypo  |
| MED31     | hypo  |
| MEF2A     | hyper |
| MEF2C     | hyper |
| MEFV      | hyper |
| MEG3      | hyper |
| MEGF11    | hyper |
| MEGF8     | hypo  |
| MEIG1     | hypo  |
| MEIS1     | hyper |
| MEIS2     | hyper |
| MESDC1    | hypo  |
| MET       | hypo  |
| METRNL    | hypo  |
| METRNL    | hypo  |
| METT10D   | hypo  |
| METTLL11B | hyper |
| METTLL13  | hyper |
| METTLL7B  | hypo  |
| MEX3B     | hyper |
| MEX3D     | hyper |
| MFAP3L    | hypo  |
| MFF       | hypo  |
| MFI2      | hypo  |
| MFN1      | hypo  |
| MFRP      | hypo  |
| MFSD3     | hypo  |
| MFSD4     | hypo  |
| MFSD7     | hyper |
| MFSD8     | hypo  |
| MFSD9     | hyper |
| MGA       | hyper |
| MGAM      | hypo  |
| MGC23284  | hyper |
| MGC2752   | hypo  |
| MGLL      | hyper |
| MGST2     | hyper |
| MGST3     | hyper |
| MIAT      | hypo  |
| MICAL3    | hyper |
| MICB      | hypo  |
| MIDN      | hyper |
| MIER2     | hyper |
| MIOX      | hypo  |



|          |       |
|----------|-------|
| MIR1253  | hyper |
| MIR1275  | hypo  |
| MIR128-2 | hyper |
| MIR1323  | hyper |
| MIR181B1 | hypo  |
| MIR190B  | hypo  |
| MIR200A  | hypo  |
| MIR29B1  | hypo  |
| MIR29C   | hyper |
| MIR30C2  | hypo  |
| MIR330   | hypo  |
| MIR33B   | hyper |
| MIR483   | hypo  |
| MIR487A  | hypo  |
| MIR493   | hypo  |
| MIR520A  | hypo  |
| MIR548H4 | hypo  |
| MIR548N  | hyper |
| MIR563   | hyper |
| MIR574   | hyper |
| MIR596   | hyper |
| MIR629   | hypo  |
| MIR638   | hypo  |
| MIR663   | hyper |
| MIR758   | hypo  |
| MIR769   | hypo  |
| MIR874   | hypo  |
| MIR942   | hypo  |
| MIS12    | hypo  |
| MKI67    | hypo  |
| MKL2     | hypo  |
| MKLN1    | hyper |
| MKRN1    | hypo  |
| MKS1     | hypo  |
| MLC1     | hyper |
| MLF2     | hyper |
| MLH1     | hypo  |
| MLL3     | hyper |
| MLL4     | hypo  |
| MLLT1    | hypo  |
| MLN      | hypo  |
| MLPH     | hypo  |
| MLXIPL   | hypo  |
| MMADHC   | hypo  |
| MMD2     | hyper |
| MME      | hyper |
| MMEL1    | hyper |
| MMP14    | hypo  |
| MMP21    | hyper |
| MMP25    | hypo  |
| MMP26    | hyper |
| MMP9     | hyper |
| MMRN1    | hyper |
| MN1      | hyper |
| MND1     | hypo  |
| MNT      | hypo  |
| MNX1     | hyper |
| MOBKL2A  | hyper |

|         |       |
|---------|-------|
| MOCS2   | hypo  |
| MOG     | hyper |
| MOGAT3  | hypo  |
| MOGS    | hypo  |
| MON1A   | hyper |
| MON2    | hypo  |
| MORC3   | hypo  |
| MORN1   | hypo  |
| MOSC1   | hypo  |
| MOSC2   | hypo  |
| MOV10   | hyper |
| MPP2    | hyper |
| MPP3    | hyper |
| MPP5    | hyper |
| MPPE1   | hypo  |
| MPRIP   | hyper |
| MRC2    | hypo  |
| MRE11A  | hyper |
| MRGPRE  | hyper |
| MRGPRF  | hyper |
| MRGPRX2 | hypo  |
| MRI1    | hypo  |
| MRM1    | hyper |
| MRPL14  | hypo  |
| MRPL15  | hypo  |
| MRPL17  | hypo  |
| MRPL30  | hypo  |
| MRPL36  | hypo  |
| MRPL43  | hypo  |
| MRPL48  | hypo  |
| MRPL54  | hypo  |
| MRPL55  | hypo  |
| MRPS10  | hyper |
| MRPS22  | hypo  |
| MRPS24  | hypo  |
| MRPS27  | hyper |
| MRPS36  | hypo  |
| MRTO4   | hypo  |
| MS4A15  | hypo  |
| MS4A6E  | hypo  |
| MSH3    | hyper |
| MSI1    | hyper |
| MSL2    | hyper |
| MSLN    | hypo  |
| MSLNL   | hypo  |
| MSRB3   | hypo  |
| MST1R   | hyper |
| MT1B    | hypo  |
| MT1E    | hypo  |
| MTF2    | hyper |
| MTFR1   | hypo  |
| MTHFSD  | hyper |
| MTIF3   | hyper |
| MTMR12  | hyper |
| MTMR15  | hypo  |
| MTMR7   | hyper |
| MTMR9L  | hyper |
| MTOR    | hypo  |

|          |       |
|----------|-------|
| MTPAP    | hypo  |
| MTR      | hypo  |
| MTSS1    | hypo  |
| MTUS1    | hyper |
| MTUS2    | hyper |
| MUC1     | hypo  |
| MUC12    | hyper |
| MUC13    | hypo  |
| MUC15    | hyper |
| MUC16    | hypo  |
| MUC2     | hypo  |
| MUDENG   | hypo  |
| MX1      | hypo  |
| MXD1     | hypo  |
| MXD4     | hypo  |
| MYADM    | hyper |
| MYADML2  | hypo  |
| MYBBP1A  | hypo  |
| MYBPC1   | hyper |
| MYCBP    | hypo  |
| MYCBPAP  | hyper |
| MYH10    | hypo  |
| MYH16    | hypo  |
| MYH3     | hyper |
| MYH4     | hypo  |
| MYH6     | hypo  |
| MYH8     | hyper |
| MYH9     | hyper |
| MYLK4    | hypo  |
| MYO15A   | hypo  |
| MYO15B   | hyper |
| MYO18A   | hyper |
| MYO1D    | hypo  |
| MYO1G    | hyper |
| MYO9A    | hyper |
| MYO9B    | hypo  |
| MYOC     | hypo  |
| MYOD1    | hyper |
| MYOM3    | hyper |
| MYST4    | hypo  |
| MZF1     | hyper |
| N6AMT2   | hyper |
| NAA15    | hypo  |
| NAA38    | hypo  |
| NAALADL2 | hyper |
| NAB1     | hypo  |
| NAB2     | hypo  |
| NACA2    | hypo  |
| NACC1    | hypo  |
| NADSYN1  | hypo  |
| NAF1     | hyper |
| NAGA     | hypo  |
| NAMPT    | hypo  |
| NANOG    | hypo  |
| NAPB     | hypo  |
| NAT15    | hyper |
| NAV1     | hyper |
| NBEA     | hyper |

|            |       |
|------------|-------|
| NBEAL2     | hypo  |
| NBL1       | hypo  |
| NCAM1      | hypo  |
| NCAPG      | hypo  |
| NCAPH      | hypo  |
| NCF2       | hypo  |
| NCK2       | hyper |
| NCKAP5     | hyper |
| NCLN       | hypo  |
| NCOR2      | hyper |
| NCRNA00092 | hyper |
| NCRNA00111 | hypo  |
| NCRNA00174 | hypo  |
| NCRNA00175 | hypo  |
| NCSTN      | hypo  |
| NDC80      | hypo  |
| NDEL1      | hyper |
| NDFIP2     | hyper |
| NDN        | hypo  |
| NDRG3      | hyper |
| NDUFA10    | hyper |
| NDUFA12    | hypo  |
| NDUFA13    | hypo  |
| NDUFA4     | hypo  |
| NDUFA8     | hyper |
| NDUFB4     | hypo  |
| NDUFB7     | hypo  |
| NDUFB8     | hypo  |
| NDUFS4     | hyper |
| NDUFS6     | hypo  |
| NDUFS7     | hyper |
| NDUFV2     | hypo  |
| NEAT1      | hypo  |
| NEB        | hypo  |
| NECAP2     | hypo  |
| NEDD4      | hypo  |
| NEDD9      | hyper |
| NEFH       | hyper |
| NEK10      | hyper |
| NEK3       | hypo  |
| NEK5       | hyper |
| NEK6       | hyper |
| NEK8       | hypo  |
| NELF       | hyper |
| NELL1      | hyper |
| NEU1       | hyper |
| NEUROD4    | hyper |
| NEUROG1    | hyper |
| NEUROG2    | hypo  |
| NEUROG3    | hyper |
| NFAM1      | hypo  |
| NFATC2IP   | hyper |
| NFATC4     | hyper |
| NFE2L3     | hypo  |
| NFIB       | hyper |
| NFIC       | hyper |
| NFIX       | hypo  |
| NFKB2      | hypo  |

|           |       |
|-----------|-------|
| NFXL1     | hyper |
| NFYC      | hyper |
| NGEF      | hypo  |
| NGFR      | hypo  |
| NHEJ1     | hyper |
| NHLRC1    | hyper |
| NHP2      | hypo  |
| NHSL1     | hyper |
| NICN1     | hyper |
| NID2      | hyper |
| NIN       | hyper |
| NIPA1     | hypo  |
| NIPAL2    | hyper |
| NIPBL     | hypo  |
| NIPSNAP3B | hyper |
| NKAIN1    | hypo  |
| NKAIN4    | hypo  |
| NKAPL     | hyper |
| NKX2-2    | hyper |
| NKX2-3    | hyper |
| NKX2-8    | hyper |
| NKX3-2    | hyper |
| NKX6-1    | hyper |
| NLGN1     | hyper |
| NLGN2     | hyper |
| NLK       | hypo  |
| NMBR      | hyper |
| NME2      | hypo  |
| NME6      | hypo  |
| NME7      | hypo  |
| NMNAT1    | hyper |
| NMNAT3    | hyper |
| NMT2      | hyper |
| NMUR2     | hypo  |
| NOD2      | hyper |
| NOL10     | hypo  |
| NOL4      | hyper |
| NOP16     | hypo  |
| NOS1      | hyper |
| NOSTRIN   | hyper |
| NOTCH3    | hyper |
| NPAS3     | hyper |
| NPAS4     | hyper |
| NPC2      | hypo  |
| NPDC1     | hypo  |
| NPFF      | hyper |
| NPHP1     | hyper |
| NPHS2     | hypo  |
| NPM1      | hypo  |
| NPR3      | hyper |
| NPTN      | hyper |
| NPTX1     | hypo  |
| NPTX2     | hyper |
| NPVF      | hyper |
| NPY       | hypo  |
| NR2E1     | hyper |
| NR2F1     | hypo  |
| NR2F6     | hyper |

|         |       |
|---------|-------|
| NR3C2   | hyper |
| NR4A2   | hyper |
| NR5A1   | hypo  |
| NR6A1   | hyper |
| NRAP    | hyper |
| NRARP   | hyper |
| NRBP2   | hypo  |
| NRCAM   | hypo  |
| NRF1    | hypo  |
| NRG1    | hyper |
| NRGN    | hyper |
| NRP2    | hypo  |
| NRSN1   | hyper |
| NRXN3   | hyper |
| NSL1    | hypo  |
| NSMCE1  | hyper |
| NSUN5   | hyper |
| NT5C1B  | hyper |
| NT5C3L  | hypo  |
| NTAN1   | hyper |
| NTF3    | hyper |
| NTNG1   | hyper |
| NTNG2   | hyper |
| NTSR2   | hyper |
| NUB1    | hypo  |
| NUDCD2  | hyper |
| NUDT12  | hyper |
| NUDT18  | hypo  |
| NUDT22  | hypo  |
| NUMA1   | hyper |
| NUMBL   | hypo  |
| NUP153  | hypo  |
| NUP155  | hypo  |
| NUP37   | hypo  |
| NXPH1   | hyper |
| NXPH2   | hyper |
| NXT1    | hypo  |
| NYNRIN  | hypo  |
| OAF     | hyper |
| OBFC1   | hypo  |
| OBSL1   | hyper |
| ODC1    | hyper |
| ODF2    | hyper |
| ODZ2    | hypo  |
| ODZ3    | hyper |
| OGDHL   | hyper |
| OGFOD2  | hypo  |
| OGFR    | hypo  |
| OLFM1   | hyper |
| OLFM2   | hyper |
| OLIG2   | hyper |
| ONECUT1 | hyper |
| ONECUT3 | hyper |
| OPALIN  | hypo  |
| OPRL1   | hypo  |
| OPTN    | hypo  |
| OR10AD1 | hyper |
| OR10C1  | hyper |

|          |       |
|----------|-------|
| OR11A1   | hypo  |
| OR11H6   | hypo  |
| OR11L1   | hypo  |
| OR1G1    | hypo  |
| OR2A14   | hypo  |
| OR2L1P   | hypo  |
| OR2Z1    | hypo  |
| OR4C6    | hypo  |
| OR4D2    | hyper |
| OR4F6    | hyper |
| OR52E2   | hypo  |
| OR52I2   | hypo  |
| OR5AS1   | hyper |
| OR5AU1   | hypo  |
| OR5K3    | hyper |
| OR5P3    | hypo  |
| OR6B1    | hyper |
| OR7G1    | hypo  |
| OR8D1    | hyper |
| OR8U8    | hypo  |
| ORAOV1   | hyper |
| ORC4L    | hypo  |
| ORC5L    | hypo  |
| OSBP     | hyper |
| OSBP2    | hypo  |
| OSBPL10  | hyper |
| OSBPL5   | hyper |
| OSGIN1   | hyper |
| OSMR     | hyper |
| OSR1     | hyper |
| OSR2     | hyper |
| OSTalpha | hypo  |
| OSTBETA  | hyper |
| OSTC     | hyper |
| OSTM1    | hyper |
| OTOF     | hypo  |
| OTP      | hyper |
| OTUD4    | hypo  |
| OTUD6B   | hypo  |
| OTX1     | hyper |
| OVCH2    | hypo  |
| OVGP1    | hypo  |
| OXER1    | hyper |
| OXGR1    | hyper |
| P2RX4    | hyper |
| P2RX5    | hypo  |
| P2RY6    | hypo  |
| P4HA2    | hypo  |
| P4HA3    | hyper |
| PACS1    | hypo  |
| PACSIN1  | hyper |
| PADI4    | hyper |
| PAF1     | hypo  |
| PAFAH1B1 | hypo  |
| PAG1     | hyper |
| PAIP2B   | hypo  |
| PAK4     | hyper |
| PAK6     | hyper |

|          |       |
|----------|-------|
| PALLD    | hyper |
| PANK1    | hypo  |
| PANK2    | hypo  |
| PANK4    | hyper |
| PAOX     | hypo  |
| PAPPA2   | hyper |
| PAPSS1   | hypo  |
| PAQR5    | hyper |
| PAQR8    | hyper |
| PARD3B   | hyper |
| PARN     | hyper |
| PARP16   | hyper |
| PARP2    | hypo  |
| PARP4    | hypo  |
| PAR-SN   | hyper |
| PARVG    | hyper |
| PATE3    | hypo  |
| PAX1     | hypo  |
| PAX2     | hyper |
| PAX6     | hyper |
| PAX9     | hyper |
| PBX1     | hyper |
| PCBP2    | hypo  |
| PCCB     | hypo  |
| PCDH17   | hyper |
| PCDH18   | hyper |
| PCDH24   | hyper |
| PCDH9    | hypo  |
| PCDHA1   | hyper |
| PCDHA2   | hyper |
| PCDHA7   | hypo  |
| PCDHA9   | hyper |
| PCDHB1   | hyper |
| PCDHB14  | hyper |
| PCDHB15  | hyper |
| PCDHB17  | hyper |
| PCDHB18  | hyper |
| PCDHB19P | hyper |
| PCDHB2   | hyper |
| PCDHB4   | hyper |
| PCDHB5   | hyper |
| PCDHGA1  | hyper |
| PCDHGA2  | hyper |
| PCDHGB4  | hyper |
| PCGF2    | hypo  |
| PCGF3    | hyper |
| PCIF1    | hypo  |
| PCK1     | hypo  |
| PCMTD2   | hypo  |
| PCNXL2   | hyper |
| PCOLCE2  | hyper |
| PCSK1    | hyper |
| PCSK6    | hypo  |
| PCSK9    | hyper |
| PCYOX1   | hyper |
| PCYT1A   | hypo  |
| PDAP1    | hypo  |
| PDCD5    | hyper |



|         |       |
|---------|-------|
| PDCD7   | hyper |
| PDE12   | hypo  |
| PDE1A   | hyper |
| PDE4A   | hypo  |
| PDE4DIP | hypo  |
| PDE6A   | hypo  |
| PDE6B   | hyper |
| PDE6D   | hypo  |
| PDE6G   | hypo  |
| PDE7B   | hyper |
| PDE8A   | hypo  |
| PDE9A   | hyper |
| PDGFA   | hypo  |
| PDGFD   | hyper |
| PDHA2   | hypo  |
| PDIA4   | hyper |
| PDIA5   | hyper |
| PDIA6   | hypo  |
| PDLIM1  | hyper |
| PDLIM3  | hyper |
| PDP1    | hypo  |
| PDPK1   | hyper |
| PDPN    | hyper |
| PDSS1   | hyper |
| PDXP    | hyper |
| PEBP4   | hypo  |
| PEG3    | hyper |
| PELI1   | hypo  |
| PELI2   | hyper |
| PENK    | hyper |
| PER2    | hypo  |
| PER3    | hyper |
| PEX11A  | hyper |
| PEX14   | hypo  |
| PEX5    | hypo  |
| PFDN6   | hypo  |
| PFN3    | hypo  |
| PGAM1   | hypo  |
| PGAM2   | hyper |
| PGAP3   | hyper |
| PGBD5   | hyper |
| PGGT1B  | hypo  |
| PGPEP1  | hyper |
| PGS1    | hypo  |
| PHACTR3 | hyper |
| PHF12   | hypo  |
| PHF15   | hypo  |
| PHF20L1 | hyper |
| PHF21A  | hypo  |
| PHF21B  | hyper |
| PHF7    | hyper |
| PHLDA2  | hypo  |
| PHLDB1  | hypo  |
| PHLPP2  | hypo  |
| PHOX2B  | hypo  |
| PHRF1   | hyper |
| PHTF2   | hypo  |
| PHYH    | hypo  |

|         |       |
|---------|-------|
| PHYHIPL | hyper |
| PI15    | hypo  |
| PI4K2B  | hypo  |
| PIAS1   | hyper |
| PIGB    | hypo  |
| PIGO    | hypo  |
| PIGY    | hypo  |
| PIGZ    | hypo  |
| PIK3AP1 | hypo  |
| PIK3IP1 | hyper |
| PIM3    | hypo  |
| PINK1   | hyper |
| PIP4K2A | hyper |
| PIP5K1C | hyper |
| PIP5KL1 | hypo  |
| PITPNM2 | hyper |
| PIWIL1  | hyper |
| PKD1    | hyper |
| PKD1L2  | hyper |
| PKDCC   | hypo  |
| PKIB    | hyper |
| PKIG    | hyper |
| PKLR    | hyper |
| PKNOX1  | hypo  |
| PLA2G15 | hypo  |
| PLA2G1B | hypo  |
| PLA2G2E | hypo  |
| PLA2G2F | hypo  |
| PLA2G3  | hypo  |
| PLA2G6  | hypo  |
| PLAA    | hypo  |
| PLAC2   | hyper |
| PLAC8   | hyper |
| PLAGL1  | hypo  |
| PLAT    | hypo  |
| PLB1    | hypo  |
| PLCB2   | hyper |
| PLCB4   | hyper |
| PLCG2   | hyper |
| PLCXD2  | hypo  |
| PLEC1   | hypo  |
| PLEKHA2 | hyper |
| PLEKHA4 | hyper |
| PLEKHA6 | hypo  |
| PLEKHB1 | hyper |
| PLEKHF2 | hypo  |
| PLEKHG1 | hyper |
| PLEKHG2 | hypo  |
| PLEKHG4 | hyper |
| PLEKHH2 | hyper |
| PLEKHH3 | hypo  |
| PLEKHN1 | hypo  |
| PLIN4   | hypo  |
| PLLP    | hyper |
| PLOD2   | hyper |
| PLOD3   | hypo  |
| PLSCR1  | hyper |
| PLSCR2  | hyper |

|          |       |
|----------|-------|
| PLSCR3   | hypo  |
| PLSCR4   | hypo  |
| PLVAP    | hyper |
| PLXNC1   | hyper |
| PM20D2   | hypo  |
| PMEPA1   | hypo  |
| PML      | hyper |
| PMM2     | hypo  |
| PMPCA    | hyper |
| PMPCB    | hyper |
| PMS1     | hyper |
| PMVK     | hypo  |
| PNKP     | hypo  |
| PNLDC1   | hyper |
| PNLIP    | hyper |
| PNMA1    | hypo  |
| PNOC     | hyper |
| PNPLA7   | hypo  |
| PNPT1    | hypo  |
| PODN     | hypo  |
| PODXL2   | hyper |
| POLD2    | hypo  |
| POLG2    | hypo  |
| POLR1B   | hyper |
| POLR1D   | hyper |
| POLR1E   | hypo  |
| POLR2C   | hypo  |
| POLR2G   | hypo  |
| POLR2I   | hypo  |
| POLR3G   | hypo  |
| POLR3H   | hypo  |
| POLS     | hyper |
| POMGNT1  | hyper |
| PON2     | hyper |
| PON3     | hyper |
| POP1     | hyper |
| POPDC2   | hypo  |
| POSTN    | hypo  |
| POTEC    | hyper |
| POU2F2   | hyper |
| POU3F1   | hypo  |
| POU4F1   | hyper |
| POU4F2   | hyper |
| POU4F3   | hyper |
| POU5F1   | hyper |
| POU6F2   | hyper |
| PPAPDC1A | hyper |
| PPARD    | hypo  |
| PPCDC    | hypo  |
| PPFIA1   | hypo  |
| PPFIA3   | hypo  |
| PPHLN1   | hypo  |
| PPIG     | hypo  |
| PPIH     | hypo  |
| PPIL6    | hyper |
| PPL      | hypo  |
| PPM1A    | hypo  |
| PPM1J    | hypo  |

|          |       |
|----------|-------|
| PPM1K    | hypo  |
| PPM1L    | hypo  |
| PPME1    | hyper |
| PPP1R11  | hyper |
| PPP1R13L | hypo  |
| PPP1R14B | hypo  |
| PPP1R16B | hypo  |
| PPP1R2   | hyper |
| PPP1R2P3 | hyper |
| PPP1R3B  | hypo  |
| PPP1R3C  | hyper |
| PPP1R3G  | hyper |
| PPP1R7   | hyper |
| PPP1R9B  | hypo  |
| PPP2R1B  | hyper |
| PPP2R2B  | hyper |
| PPP2R2D  | hyper |
| PPP2R4   | hyper |
| PPP2R5B  | hypo  |
| PPP4R1   | hyper |
| PPP4R2   | hypo  |
| PPRC1    | hypo  |
| PPT1     | hypo  |
| PRAM1    | hyper |
| PRAME    | hypo  |
| PRCD     | hypo  |
| PRDM1    | hypo  |
| PRDM11   | hyper |
| PRDM13   | hyper |
| PRDM15   | hyper |
| PRDM5    | hypo  |
| PRDM6    | hypo  |
| PRDM8    | hypo  |
| PREPL    | hypo  |
| PREX1    | hyper |
| PRG2     | hypo  |
| PRHOXNB  | hyper |
| PRICKLE1 | hyper |
| PRICKLE2 | hypo  |
| PRICKLE4 | hypo  |
| PRKAB2   | hypo  |
| PRKACA   | hypo  |
| PRKAG3   | hypo  |
| PRKAR1A  | hypo  |
| PRKCB    | hyper |
| PRKCD    | hyper |
| PRKCG    | hyper |
| PRKCI    | hyper |
| PRKD2    | hyper |
| PRKG2    | hypo  |
| PRLHR    | hyper |
| PRMT1    | hypo  |
| PRMT3    | hypo  |
| PRMT7    | hyper |
| PROKR1   | hypo  |
| PROX1    | hyper |
| PROZ     | hypo  |
| PRPF38B  | hyper |

|          |       |
|----------|-------|
| PRPF8    | hyper |
| PRPH     | hyper |
| PRPH2    | hypo  |
| PRPSAP1  | hypo  |
| PRR14    | hyper |
| PRR16    | hyper |
| PRR18    | hyper |
| PRR3     | hypo  |
| PRRC1    | hyper |
| PRRT3    | hyper |
| PRSS35   | hypo  |
| PRTFDC1  | hypo  |
| PRTN3    | hyper |
| PSD      | hyper |
| PSKH2    | hyper |
| PSMA5    | hypo  |
| PSMA7    | hyper |
| PSMA8    | hyper |
| PSMB2    | hypo  |
| PSMB3    | hypo  |
| PSMB8    | hypo  |
| PSMB9    | hypo  |
| PSMD7    | hypo  |
| PSME4    | hypo  |
| PSMF1    | hyper |
| PSORS1C1 | hypo  |
| PSTPIP1  | hyper |
| PTCH1    | hypo  |
| PTDSS2   | hyper |
| PTER     | hyper |
| PTGDR    | hyper |
| PTGER2   | hyper |
| PTGER3   | hyper |
| PTGIS    | hyper |
| PTH1R    | hypo  |
| PTH2     | hyper |
| PTH2R    | hyper |
| PTHLH    | hyper |
| PTK2B    | hypo  |
| PTMA     | hypo  |
| PTPLAD1  | hypo  |
| PTPMT1   | hyper |
| PTPN11   | hyper |
| PTPN13   | hyper |
| PTPN18   | hyper |
| PTPN3    | hyper |
| PTPRC    | hypo  |
| PTPRE    | hypo  |
| PTPRF    | hypo  |
| PTPRG    | hyper |
| PTPRO    | hyper |
| PTPRS    | hyper |
| PTPRU    | hyper |
| PTRF     | hyper |
| PTTG1    | hypo  |
| PTTG1IP  | hypo  |
| PUM1     | hypo  |
| PURA     | hypo  |

|           |       |
|-----------|-------|
| PURG      | hyper |
| PVRL4     | hyper |
| PVT1      | hyper |
| PWWP2A    | hypo  |
| PXDNL     | hyper |
| PXMP3     | hypo  |
| PXN       | hyper |
| PXT1      | hypo  |
| PYCR1     | hyper |
| PYCR2     | hypo  |
| PYCRL     | hypo  |
| PYGO1     | hyper |
| PYROXD1   | hypo  |
| QSOX1     | hyper |
| QSOX2     | hypo  |
| RAB11FIP3 | hypo  |
| RAB13     | hyper |
| RAB18     | hypo  |
| RAB21     | hypo  |
| RAB22A    | hypo  |
| RAB27A    | hypo  |
| RAB2B     | hypo  |
| RAB30     | hypo  |
| RAB36     | hyper |
| RAB37     | hyper |
| RAB38     | hyper |
| RAB40B    | hypo  |
| RAB4A     | hypo  |
| RAB8A     | hypo  |
| RAB9P1    | hyper |
| RABEPK    | hypo  |
| RABIF     | hyper |
| RABL4     | hypo  |
| RAD18     | hypo  |
| RAD23B    | hypo  |
| RAD50     | hyper |
| RAD51AP1  | hyper |
| RAD51L1   | hypo  |
| RAD52     | hypo  |
| RAD9A     | hypo  |
| RAET1K    | hypo  |
| RAI1      | hyper |
| RALGPS1   | hypo  |
| RAP1A     | hypo  |
| RAP1GAP2  | hyper |
| RAP2B     | hypo  |
| RAPGEF5   | hyper |
| RAPGEF6   | hypo  |
| RARG      | hypo  |
| RARRES2   | hyper |
| RARRES3   | hypo  |
| RARS      | hyper |
| RASAL2    | hyper |
| RASD1     | hypo  |
| RASGRF1   | hyper |
| RASGRP2   | hyper |
| RASIP1    | hypo  |
| RASL10B   | hyper |

|         |       |
|---------|-------|
| RASL11B | hyper |
| RASSF1  | hyper |
| RASSF10 | hypo  |
| RASSF2  | hypo  |
| RASSF4  | hyper |
| RASSF6  | hyper |
| RAX2    | hyper |
| RBBP6   | hyper |
| RBM14   | hypo  |
| RBM15B  | hypo  |
| RBM19   | hypo  |
| RBM27   | hyper |
| RBM33   | hypo  |
| RBM38   | hypo  |
| RBM43   | hypo  |
| RBM47   | hypo  |
| RBM6    | hypo  |
| RBMXL1  | hypo  |
| RBP1    | hypo  |
| RBP7    | hyper |
| RBPJ    | hypo  |
| RC3H1   | hyper |
| RC3H2   | hyper |
| RCAN2   | hyper |
| RCC2    | hyper |
| RCVRN   | hyper |
| RDH11   | hyper |
| RDH14   | hyper |
| RDX     | hyper |
| REEP4   | hypo  |
| RELN    | hyper |
| RER1    | hyper |
| REST    | hyper |
| REV1    | hypo  |
| REXO1   | hyper |
| REXO2   | hypo  |
| RFESD   | hypo  |
| RFPL2   | hyper |
| RFPL3S  | hyper |
| RFTN1   | hyper |
| RFWD3   | hypo  |
| RFX2    | hyper |
| RFX4    | hyper |
| RFX6    | hyper |
| RFXAP   | hypo  |
| RG9MTD2 | hypo  |
| RGL3    | hyper |
| RGP1    | hypo  |
| RGS10   | hypo  |
| RGS12   | hyper |
| RGS17   | hypo  |
| RGS5    | hyper |
| RGS7BP  | hyper |
| RHBDD2  | hypo  |
| RHBDL3  | hypo  |
| RHBG    | hypo  |
| RHCG    | hypo  |
| RHOBTB2 | hypo  |

|           |       |
|-----------|-------|
| RHOBTB3   | hyper |
| RHOD      | hyper |
| RHOF      | hypo  |
| RHOH      | hypo  |
| RHOT2     | hyper |
| RIBC2     | hyper |
| RICH2     | hypo  |
| RICTOR    | hypo  |
| RILPL1    | hyper |
| RIMS1     | hyper |
| RIMS2     | hyper |
| RIMS4     | hyper |
| RING1     | hypo  |
| RIOK2     | hypo  |
| RIPK3     | hyper |
| RIPK4     | hypo  |
| RLTPR     | hyper |
| RMST      | hypo  |
| RNASE1    | hypo  |
| RNASE13   | hypo  |
| RND1      | hyper |
| RNF114    | hyper |
| RNF126    | hypo  |
| RNF14     | hypo  |
| RNF152    | hyper |
| RNF157    | hypo  |
| RNF186    | hypo  |
| RNF20     | hyper |
| RNF212    | hyper |
| RNF216L   | hyper |
| RNF220    | hyper |
| RNF34     | hypo  |
| RNF38     | hyper |
| RNF4      | hypo  |
| RNF40     | hypo  |
| RNF43     | hypo  |
| RNF5P1    | hypo  |
| RNFT2     | hypo  |
| RNGTT     | hypo  |
| RNMTL1    | hyper |
| RNPC3     | hypo  |
| RNPEP     | hypo  |
| RNU5E     | hyper |
| ROBO1     | hyper |
| ROBO2     | hyper |
| ROBO3     | hyper |
| ROR2      | hyper |
| RORA      | hypo  |
| ROS1      | hyper |
| RPAIN     | hypo  |
| RPL10A    | hypo  |
| RPL11     | hypo  |
| RPL13     | hypo  |
| RPL13AP20 | hypo  |
| RPL13AP5  | hypo  |
| RPL14     | hyper |
| RPL23A    | hypo  |
| RPL24     | hypo  |



|         |       |
|---------|-------|
| RPL28   | hypo  |
| RPL29   | hypo  |
| RPL30   | hypo  |
| RPL35   | hypo  |
| RPL41   | hypo  |
| RPL5    | hypo  |
| RPL6    | hypo  |
| RPLP2   | hypo  |
| RPN1    | hypo  |
| RPP14   | hypo  |
| RPP30   | hypo  |
| RPRD2   | hyper |
| RPS14   | hypo  |
| RPS18   | hypo  |
| RPS19   | hypo  |
| RPS2    | hypo  |
| RPS27A  | hypo  |
| RPS3    | hypo  |
| RPS6KA1 | hyper |
| RPS6KC1 | hypo  |
| RPS6KL1 | hyper |
| RPSAP52 | hypo  |
| RPUSD1  | hypo  |
| RRAGD   | hyper |
| RREB1   | hyper |
| RRM1    | hypo  |
| RRM2B   | hypo  |
| RRS1    | hypo  |
| RSPO2   | hyper |
| RSRC1   | hypo  |
| RTBDN   | hypo  |
| RTDR1   | hypo  |
| RTL1    | hyper |
| RTN3    | hypo  |
| RTN4    | hypo  |
| RTN4R   | hypo  |
| RTN4RL1 | hyper |
| RTTN    | hypo  |
| RUFY1   | hyper |
| RUFY3   | hyper |
| RUNDC3A | hyper |
| RUNX1   | hyper |
| RUNX1T1 | hypo  |
| RUSC1   | hyper |
| RUVBL1  | hypo  |
| RYR1    | hyper |
| RYR2    | hypo  |
| RYR3    | hypo  |
| S100A10 | hypo  |
| S100A13 | hyper |
| S100B   | hypo  |
| S1PR3   | hypo  |
| S1PR5   | hypo  |
| SACM1L  | hypo  |
| SAFB    | hyper |
| SALL3   | hyper |
| SAMD11  | hyper |
| SAMD12  | hypo  |

|           |       |
|-----------|-------|
| SAMD13    | hyper |
| SAMD14    | hypo  |
| SAMD4A    | hypo  |
| SAMD5     | hyper |
| SAMD9L    | hyper |
| SART3     | hypo  |
| SAV1      | hyper |
| SBF1      | hyper |
| SBF2      | hypo  |
| SBNO1     | hyper |
| SCAF1     | hypo  |
| SCAND2    | hyper |
| SCAND3    | hypo  |
| SCAP      | hypo  |
| SCARNA4   | hyper |
| SCD       | hyper |
| SCFD1     | hypo  |
| SCG5      | hyper |
| SCGB1D1   | hyper |
| SCLY      | hyper |
| SCML4     | hypo  |
| SCN4A     | hyper |
| SCN5A     | hypo  |
| SCNN1A    | hyper |
| SCNN1G    | hyper |
| SCO1      | hypo  |
| SCP2      | hyper |
| SCRIB     | hyper |
| SCRN1     | hypo  |
| SCRT1     | hyper |
| SCRT2     | hyper |
| SCT       | hyper |
| SCTR      | hypo  |
| SCYL2     | hyper |
| SDC1      | hypo  |
| SDC2      | hypo  |
| SDCCAG8   | hyper |
| SDHAF1    | hypo  |
| SDR16C5   | hyper |
| SEC14L1   | hypo  |
| SEC14L4   | hypo  |
| SEC16A    | hyper |
| SEC22C    | hypo  |
| SEC23B    | hyper |
| SEC24B    | hyper |
| SEC24D    | hyper |
| SEC63     | hypo  |
| SECISBP2L | hypo  |
| SECTM1    | hypo  |
| SELM      | hypo  |
| SELO      | hypo  |
| SELT      | hypo  |
| SELV      | hypo  |
| SEMA3B    | hyper |
| SEMA3C    | hypo  |
| SEMA3D    | hypo  |
| SEMA4B    | hyper |
| SEMA5A    | hyper |

|          |       |
|----------|-------|
| SEMA5B   | hypo  |
| SEMG1    | hypo  |
| SENP7    | hyper |
| SENP8    | hypo  |
| SEPHS2   | hyper |
| SEPN1    | hyper |
| SEPW1    | hypo  |
| SERGEF   | hyper |
| SERHL2   | hypo  |
| SERINC3  | hypo  |
| SERINC4  | hyper |
| SERPINH1 | hypo  |
| SERPINI1 | hypo  |
| SESN2    | hypo  |
| SESN3    | hypo  |
| SETBP1   | hypo  |
| SETD1B   | hyper |
| SETX     | hypo  |
| SEZ6     | hyper |
| SEZ6L    | hyper |
| SF1      | hypo  |
| SF3A2    | hyper |
| SF3B2    | hypo  |
| SFMBT2   | hyper |
| SFRP4    | hyper |
| SFRP5    | hyper |
| SFRS2IP  | hypo  |
| SFRS8    | hyper |
| SFTA3    | hyper |
| SGCB     | hyper |
| SGCD     | hyper |
| SGEF     | hyper |
| SGIP1    | hyper |
| SGK196   | hyper |
| SGK3     | hyper |
| SGMS1    | hypo  |
| SGSH     | hyper |
| SGSM3    | hyper |
| SGTA     | hyper |
| SH2D4A   | hyper |
| SH2D5    | hyper |
| SH3BGRL3 | hyper |
| SH3BP5L  | hyper |
| SH3D19   | hyper |
| SH3GLB1  | hypo  |
| SH3GLB2  | hypo  |
| SH3RF1   | hyper |
| SH3TC1   | hyper |
| SH3YL1   | hyper |
| SHC3     | hyper |
| SHF      | hyper |
| SHH      | hyper |
| SHISA3   | hyper |
| SHISA6   | hypo  |
| SHISA7   | hyper |
| SHISA9   | hyper |
| SHMT2    | hyper |
| SHOX2    | hyper |

|          |       |
|----------|-------|
| SHROOM1  | hypo  |
| SIGLEC10 | hyper |
| SIGLEC15 | hyper |
| SIGLEC5  | hypo  |
| SIGLEC9  | hyper |
| SIK1     | hyper |
| SIM1     | hyper |
| SIM2     | hyper |
| SIN3A    | hypo  |
| SIPA1L1  | hyper |
| SIRPB2   | hyper |
| SIRT2    | hypo  |
| SIRT3    | hypo  |
| SIRT4    | hyper |
| SKAP2    | hypo  |
| SKI      | hypo  |
| SKP2     | hypo  |
| SLAIN1   | hypo  |
| SLAMF8   | hyper |
| SLC10A6  | hypo  |
| SLC12A1  | hypo  |
| SLC12A5  | hyper |
| SLC12A7  | hyper |
| SLC16A12 | hyper |
| SLC16A13 | hypo  |
| SLC16A3  | hyper |
| SLC16A5  | hyper |
| SLC17A2  | hyper |
| SLC17A6  | hyper |
| SLC17A7  | hyper |
| SLC19A1  | hypo  |
| SLC19A3  | hyper |
| SLC1A1   | hyper |
| SLC1A2   | hyper |
| SLC1A4   | hyper |
| SLC20A2  | hyper |
| SLC22A16 | hyper |
| SLC22A18 | hyper |
| SLC22A2  | hyper |
| SLC22A23 | hyper |
| SLC22A3  | hypo  |
| SLC23A1  | hyper |
| SLC23A3  | hypo  |
| SLC24A3  | hyper |
| SLC24A4  | hypo  |
| SLC24A6  | hypo  |
| SLC25A1  | hypo  |
| SLC25A10 | hyper |
| SLC25A13 | hyper |
| SLC25A18 | hyper |
| SLC25A24 | hyper |
| SLC25A26 | hypo  |
| SLC25A3  | hyper |
| SLC25A31 | hyper |
| SLC25A33 | hypo  |
| SLC25A37 | hypo  |
| SLC25A40 | hypo  |
| SLC25A44 | hypo  |

|          |       |
|----------|-------|
| SLC25A46 | hypo  |
| SLC26A10 | hyper |
| SLC26A5  | hyper |
| SLC26A6  | hypo  |
| SLC26A9  | hypo  |
| SLC29A1  | hypo  |
| SLC29A3  | hyper |
| SLC2A1   | hyper |
| SLC2A13  | hyper |
| SLC2A2   | hyper |
| SLC2A5   | hypo  |
| SLC33A1  | hypo  |
| SLC34A1  | hypo  |
| SLC35A3  | hyper |
| SLC35B2  | hypo  |
| SLC35B3  | hyper |
| SLC35C2  | hyper |
| SLC35D3  | hypo  |
| SLC35F1  | hyper |
| SLC37A2  | hypo  |
| SLC37A3  | hypo  |
| SLC38A1  | hypo  |
| SLC39A1  | hypo  |
| SLC39A10 | hypo  |
| SLC39A14 | hypo  |
| SLC39A7  | hypo  |
| SLC39A8  | hypo  |
| SLC3A2   | hyper |
| SLC43A2  | hyper |
| SLC44A2  | hypo  |
| SLC44A4  | hypo  |
| SLC45A1  | hypo  |
| SLC45A3  | hyper |
| SLC47A1  | hyper |
| SLC4A4   | hyper |
| SLC4A8   | hypo  |
| SLC5A1   | hypo  |
| SLC5A12  | hypo  |
| SLC5A7   | hypo  |
| SLC5A9   | hypo  |
| SLC6A1   | hypo  |
| SLC6A11  | hyper |
| SLC6A12  | hyper |
| SLC6A13  | hyper |
| SLC6A15  | hyper |
| SLC6A16  | hypo  |
| SLC6A18  | hyper |
| SLC6A19  | hypo  |
| SLC6A20  | hypo  |
| SLC6A5   | hyper |
| SLC6A6   | hypo  |
| SLC6A9   | hyper |
| SLC7A11  | hypo  |
| SLC7A2   | hyper |
| SLC7A4   | hyper |
| SLC9A2   | hyper |
| SLC9A9   | hyper |
| SLFN13   | hyper |

|             |       |
|-------------|-------|
| SLFNL1      | hypo  |
| SLIT2       | hyper |
| SLIT3       | hypo  |
| SLITRK1     | hyper |
| SLMO2       | hyper |
| SMAD3       | hypo  |
| SMAD5       | hyper |
| SMAD6       | hyper |
| SMAGP       | hyper |
| SMARCA2     | hypo  |
| SMARCA2     | hyper |
| SMARCD1     | hypo  |
| SMARCD3     | hypo  |
| SMCP        | hypo  |
| SMPD3       | hyper |
| SMPDL3A     | hyper |
| SMURF2      | hyper |
| SNAI1       | hyper |
| SNAP91      | hyper |
| SNAPC1      | hypo  |
| SNAPC2      | hyper |
| SNAPC3      | hypo  |
| SNAR-I      | hyper |
| SNCB        | hypo  |
| SNHG4       | hypo  |
| SNN         | hyper |
| SNORA26     | hypo  |
| SNORA38     | hypo  |
| SNORA9      | hypo  |
| SNORD114-23 | hypo  |
| SNORD115-9  | hyper |
| SNORD116-22 | hyper |
| SNORD18C    | hypo  |
| SNORD1C     | hypo  |
| SNORD36C    | hypo  |
| SNORD45C    | hypo  |
| SNORD46     | hypo  |
| SNORD50B    | hyper |
| SNORD9      | hyper |
| SNPH        | hypo  |
| SNRK        | hypo  |
| SNRNP200    | hyper |
| SNRNP35     | hypo  |
| SNRPA       | hyper |
| SNTA1       | hyper |
| SNTB1       | hypo  |
| SNTB2       | hyper |
| SNTG1       | hyper |
| SNTG2       | hyper |
| SNUPN       | hyper |
| SNX10       | hypo  |
| SNX11       | hyper |
| SNX2        | hyper |
| SNX20       | hypo  |
| SNX27       | hypo  |
| SNX29       | hyper |
| SNX32       | hyper |
| SNX4        | hyper |

|         |       |
|---------|-------|
| SOBP    | hyper |
| SOCS5   | hyper |
| SOCS6   | hyper |
| SOD1    | hyper |
| SOD3    | hyper |
| SOLH    | hyper |
| SORCS1  | hypo  |
| SORCS3  | hyper |
| SOS2    | hypo  |
| SOX11   | hyper |
| SOX14   | hyper |
| SOX21   | hyper |
| SOX5    | hypo  |
| SOX8    | hyper |
| SOX9    | hyper |
| SP140L  | hypo  |
| SP7     | hyper |
| SPACA3  | hyper |
| SPAG4   | hypo  |
| SPAG6   | hyper |
| SPAG7   | hypo  |
| SPATA18 | hyper |
| SPATA2  | hypo  |
| SPATA20 | hypo  |
| SPATA21 | hyper |
| SPATA22 | hyper |
| SPATA5  | hypo  |
| SPATA7  | hypo  |
| SPATS1  | hyper |
| SPDYA   | hyper |
| SPEF1   | hyper |
| SPEG    | hyper |
| SPEN    | hypo  |
| SPHK2   | hyper |
| SPHKAP  | hyper |
| SPIRE2  | hypo  |
| SPNS2   | hyper |
| SPO11   | hypo  |
| SPOCD1  | hypo  |
| SPOCK1  | hypo  |
| SPON1   | hyper |
| SPOP    | hyper |
| SPPL2B  | hyper |
| SPRR2F  | hypo  |
| SPRY1   | hyper |
| SPRY4   | hyper |
| SPRYD3  | hyper |
| SPSB1   | hyper |
| SPSB4   | hyper |
| SPTBN1  | hyper |
| SQRDL   | hypo  |
| SR140   | hypo  |
| SRCIN1  | hyper |
| SRD5A2  | hyper |
| SRGAP1  | hyper |
| SRGAP3  | hyper |
| SRI     | hyper |
| SRMS    | hypo  |

|            |       |
|------------|-------|
| SRP9       | hypo  |
| SRPRB      | hyper |
| SRRM1      | hypo  |
| SRXN1      | hypo  |
| SS18       | hypo  |
| SSBP3      | hyper |
| SSFA2      | hyper |
| SSR1       | hypo  |
| SSRP1      | hyper |
| SST        | hyper |
| SSU72      | hyper |
| ST18       | hyper |
| ST3GAL1    | hypo  |
| ST3GAL2    | hypo  |
| ST5        | hyper |
| ST6GAL2    | hyper |
| ST6GALNAC1 | hypo  |
| ST6GALNAC4 | hypo  |
| ST6GALNAC5 | hypo  |
| ST6GALNAC6 | hyper |
| ST7OT3     | hyper |
| ST8SIA1    | hyper |
| ST8SIA3    | hyper |
| ST8SIA5    | hyper |
| STAC2      | hyper |
| STAG3      | hyper |
| STARD13    | hyper |
| STARD9     | hypo  |
| STAT1      | hypo  |
| STAT2      | hypo  |
| STK19      | hyper |
| STK24      | hyper |
| STMN1      | hypo  |
| STMN3      | hyper |
| STOM       | hyper |
| STOX2      | hypo  |
| STRADA     | hypo  |
| STRBP      | hypo  |
| STRN       | hyper |
| STX16      | hypo  |
| STX18      | hyper |
| STX4       | hypo  |
| STXBP5L    | hyper |
| STYXL1     | hypo  |
| SUGT1L1    | hypo  |
| SULF2      | hyper |
| SUSD5      | hypo  |
| SUV420H1   | hyper |
| SV2C       | hyper |
| SVIL       | hypo  |
| SYCP1      | hyper |
| SYF2       | hyper |
| SYNE1      | hyper |
| SYNGR3     | hyper |
| SYNJ2      | hyper |
| SYNPR      | hyper |
| SYT14      | hyper |
| SYT5       | hyper |



|          |       |
|----------|-------|
| SYT7     | hyper |
| SYT9     | hyper |
| SYTL3    | hypo  |
| T        | hyper |
| TAAR2    | hyper |
| TAC1     | hypo  |
| TAC3     | hypo  |
| TACO1    | hypo  |
| TAF12    | hypo  |
| TAF1B    | hypo  |
| TAF1D    | hypo  |
| TAF4B    | hypo  |
| TAGLN3   | hypo  |
| TANC1    | hypo  |
| TANC2    | hyper |
| TAOK3    | hypo  |
| TAPBP    | hyper |
| TAPBPL   | hypo  |
| TARS2    | hypo  |
| TARSL2   | hyper |
| TAS1R1   | hyper |
| TAS1R2   | hyper |
| TAS2R40  | hypo  |
| TBC1D1   | hyper |
| TBC1D10A | hypo  |
| TBC1D15  | hypo  |
| TBC1D16  | hypo  |
| TBC1D17  | hypo  |
| TBC1D19  | hypo  |
| TBC1D2   | hypo  |
| TBC1D22A | hyper |
| TBC1D5   | hypo  |
| TBC1D8   | hypo  |
| TBCA     | hypo  |
| TBCC     | hyper |
| TBL1XR1  | hyper |
| TBL2     | hypo  |
| TBRG4    | hypo  |
| TBX15    | hyper |
| TBX2     | hyper |
| TBX20    | hyper |
| TBX3     | hyper |
| TBX4     | hyper |
| TBX5     | hyper |
| TBXA2R   | hyper |
| TC2N     | hypo  |
| TCEA2    | hyper |
| TCEA3    | hyper |
| TCEB1    | hypo  |
| TCF12    | hypo  |
| TCF19    | hypo  |
| TCF21    | hyper |
| TCF25    | hyper |
| TCF3     | hyper |
| TCF4     | hyper |
| TCF7L1   | hypo  |
| TCF7L2   | hyper |
| TCFL5    | hyper |

|          |       |
|----------|-------|
| TCHHL1   | hyper |
| TCIRG1   | hyper |
| TCL1A    | hypo  |
| TCL6     | hypo  |
| TCP11L2  | hypo  |
| TCTE1    | hypo  |
| TCTEX1D1 | hyper |
| TCTEX1D4 | hypo  |
| TDH      | hyper |
| TDRD10   | hypo  |
| TEAD1    | hyper |
| TEAD4    | hyper |
| TECR     | hypo  |
| TENC1    | hyper |
| TET1     | hyper |
| TEX14    | hyper |
| TFAP2D   | hyper |
| TFAP4    | hyper |
| TFDP1    | hypo  |
| TFF2     | hypo  |
| TFG      | hypo  |
| TFPI2    | hyper |
| TGFB111  | hyper |
| TGFBI    | hyper |
| TGIF1    | hypo  |
| TGM2     | hyper |
| TGM3     | hypo  |
| TGOLN2   | hypo  |
| THAP9    | hypo  |
| THBD     | hyper |
| THBS4    | hyper |
| THG1L    | hyper |
| THOC1    | hypo  |
| THRБ     | hyper |
| THRSP    | hypo  |
| THSD1P   | hypo  |
| THSD4    | hypo  |
| TIAL1    | hypo  |
| TIAM2    | hypo  |
| TIMM22   | hypo  |
| TIMM44   | hypo  |
| TIMP2    | hypo  |
| TINAGL1  | hyper |
| TIRAP    | hypo  |
| TKTL2    | hypo  |
| TLE2     | hypo  |
| TLE3     | hypo  |
| TLN2     | hyper |
| TLR9     | hypo  |
| TLX1     | hyper |
| TLX1NB   | hyper |
| TLX3     | hyper |
| TM4SF19  | hypo  |
| TM9SF1   | hyper |
| TM9SF2   | hypo  |
| TMC1     | hyper |
| TMC2     | hypo  |
| TMC4     | hyper |

|              |       |
|--------------|-------|
| TMC5         | hyper |
| TMCO2        | hyper |
| TMCO3        | hyper |
| TMCO6        | hypo  |
| TMED7-TICAM2 | hypo  |
| TMED9        | hyper |
| TMEM100      | hyper |
| TMEM120A     | hypo  |
| TMEM126A     | hyper |
| TMEM130      | hyper |
| TMEM131      | hyper |
| TMEM132E     | hyper |
| TMEM161B     | hypo  |
| TMEM171      | hyper |
| TMEM174      | hyper |
| TMEM175      | hyper |
| TMEM176B     | hyper |
| TMEM178      | hyper |
| TMEM179      | hyper |
| TMEM18       | hypo  |
| TMEM185B     | hyper |
| TMEM186      | hypo  |
| TMEM194B     | hypo  |
| TMEM195      | hyper |
| TMEM2        | hyper |
| TMEM200B     | hyper |
| TMEM200C     | hypo  |
| TMEM206      | hypo  |
| TMEM208      | hypo  |
| TMEM209      | hyper |
| TMEM215      | hypo  |
| TMEM220      | hyper |
| TMEM222      | hyper |
| TMEM229A     | hyper |
| TMEM45B      | hyper |
| TMEM51       | hyper |
| TMEM55A      | hypo  |
| TMEM56       | hypo  |
| TMEM62       | hypo  |
| TMEM82       | hyper |
| TMEM88B      | hypo  |
| TMEM8B       | hyper |
| TMEM97       | hypo  |
| TMIGD2       | hypo  |
| TMOD4        | hyper |
| TMPRSS2      | hyper |
| TMPRSS3      | hypo  |
| TMPRSS5      | hyper |
| TMPRSS6      | hypo  |
| TMTC4        | hyper |
| TNFAIP2      | hyper |
| TNFAIP8L1    | hypo  |
| TNFRSF11B    | hyper |
| TNFRSF13B    | hypo  |
| TNFRSF18     | hypo  |
| TNFRSF1A     | hypo  |
| TNFSF13      | hypo  |
| TNKS         | hyper |

|              |       |
|--------------|-------|
| TNNC1        | hypo  |
| TNNT2        | hypo  |
| TNRC6B       | hypo  |
| TNRC6C       | hyper |
| TOLLIP       | hyper |
| TOMM40       | hypo  |
| TOMM5        | hypo  |
| TOMM7        | hyper |
| TOP2A        | hypo  |
| TOR3A        | hyper |
| TOX          | hyper |
| TOX3         | hyper |
| TP53AIP1     | hypo  |
| TP53BP1      | hyper |
| TP53I13      | hypo  |
| TP53I3       | hyper |
| TP73         | hypo  |
| TPBG         | hyper |
| TPI1         | hypo  |
| TPK1         | hyper |
| TPM1         | hyper |
| TPO          | hyper |
| TPRG1L       | hyper |
| TPST1        | hyper |
| TPST2        | hypo  |
| TPX2         | hypo  |
| TRA2B        | hyper |
| TRADD        | hyper |
| TRAF1        | hyper |
| TRAF2        | hyper |
| TRAF7        | hyper |
| TRAM2        | hyper |
| TRAPPC6B     | hyper |
| TRDN         | hyper |
| TRHDE        | hyper |
| TRIM10       | hypo  |
| TRIM11       | hypo  |
| TRIM2        | hyper |
| TRIM27       | hyper |
| TRIM34       | hypo  |
| TRIM36       | hyper |
| TRIM37       | hypo  |
| TRIM38       | hypo  |
| TRIM41       | hypo  |
| TRIM42       | hyper |
| TRIM44       | hyper |
| TRIM47       | hypo  |
| TRIM5        | hypo  |
| TRIM58       | hyper |
| TRIM67       | hypo  |
| TRIM6-TRIM34 | hypo  |
| TRIM72       | hypo  |
| TRIP12       | hypo  |
| TRIP4        | hyper |
| TRMT11       | hypo  |
| TRPC6        | hyper |
| TRPM2        | hyper |
| TRPM5        | hypo  |

|          |       |
|----------|-------|
| TRPV1    | hypo  |
| TRPV4    | hyper |
| TRRAP    | hyper |
| TRUB2    | hyper |
| TSC22D1  | hypo  |
| TSGA10   | hypo  |
| TSHZ2    | hyper |
| TSN      | hyper |
| TSNAXIP1 | hypo  |
| TSPAN13  | hyper |
| TSPAN17  | hypo  |
| TSPAN4   | hypo  |
| TSPAN9   | hyper |
| TSPO     | hyper |
| TSSC1    | hyper |
| TTBK1    | hypo  |
| TTC24    | hypo  |
| TTC39A   | hyper |
| TTC9B    | hyper |
| TTK      | hyper |
| TLL13    | hyper |
| TLL8     | hyper |
| TTYH2    | hypo  |
| TUB      | hypo  |
| TUBB     | hypo  |
| TUBB2B   | hypo  |
| TUBG2    | hyper |
| TUBGCP6  | hyper |
| TUFT1    | hyper |
| TWIST1   | hyper |
| TWISTNB  | hypo  |
| TWSG1    | hypo  |
| TXN2     | hyper |
| TXNDC11  | hypo  |
| TXNDC17  | hypo  |
| TXNDC9   | hypo  |
| TXNL4B   | hypo  |
| TXNRD1   | hypo  |
| TYMS     | hyper |
| TYR      | hypo  |
| UBAC2    | hypo  |
| UBD      | hypo  |
| UBE2B    | hypo  |
| UBE2CBP  | hypo  |
| UBE2D1   | hyper |
| UBE2D3   | hypo  |
| UBE2I    | hyper |
| UBE2K    | hyper |
| UBE2L3   | hyper |
| UBE2N    | hypo  |
| UBE2Q1   | hyper |
| UBE2S    | hypo  |
| UBE2Z    | hypo  |
| UBE3C    | hypo  |
| UBFD1    | hypo  |
| UBIAD1   | hypo  |
| UBL3     | hypo  |
| UBL4B    | hypo  |

|         |       |
|---------|-------|
| UBL7    | hypo  |
| UBP1    | hyper |
| UBR1    | hypo  |
| UBR3    | hypo  |
| UBR5    | hyper |
| UBTD2   | hypo  |
| UBTF    | hyper |
| UBXN1   | hyper |
| UBXN10  | hypo  |
| UCK2    | hyper |
| UCKL1   | hyper |
| UCN3    | hyper |
| UCP1    | hyper |
| UFSP2   | hypo  |
| UGCG    | hypo  |
| UGDH    | hypo  |
| UGP2    | hypo  |
| UGT1A10 | hyper |
| UGT3A1  | hyper |
| UGT8    | hyper |
| UIMC1   | hyper |
| ULK1    | hypo  |
| UNC5A   | hyper |
| UNC5C   | hyper |
| UNC5D   | hypo  |
| UNC80   | hyper |
| UNC84A  | hypo  |
| UNCX    | hyper |
| UNKL    | hypo  |
| UPF1    | hypo  |
| UPK1A   | hyper |
| UPK3A   | hyper |
| UPP2    | hypo  |
| URM1    | hypo  |
| USF1    | hyper |
| USH1G   | hyper |
| USH2A   | hyper |
| USO1    | hyper |
| USP10   | hyper |
| USP13   | hyper |
| USP14   | hyper |
| USP15   | hypo  |
| USP18   | hypo  |
| USP2    | hyper |
| USP24   | hyper |
| USP28   | hypo  |
| USP29   | hyper |
| USP4    | hypo  |
| USP40   | hypo  |
| USP45   | hyper |
| USP46   | hypo  |
| USP49   | hyper |
| USP5    | hypo  |
| USP50   | hyper |
| USP6NL  | hypo  |
| USP7    | hypo  |
| USPL1   | hypo  |
| UST     | hypo  |

|          |       |
|----------|-------|
| UTRN     | hyper |
| UTS2R    | hyper |
| UVRAG    | hypo  |
| VAMP8    | hyper |
| VARS     | hyper |
| VARS2    | hyper |
| VASH1    | hyper |
| VAT1L    | hypo  |
| VAX1     | hyper |
| VCAN     | hypo  |
| VEGFA    | hypo  |
| VENTX    | hyper |
| VEPH1    | hyper |
| VIM      | hypo  |
| VIPR1    | hyper |
| VIPR2    | hypo  |
| VIT      | hypo  |
| VNN1     | hyper |
| VOPP1    | hyper |
| VPS13D   | hyper |
| VPS52    | hyper |
| VPS72    | hypo  |
| VPS8     | hyper |
| VRK3     | hypo  |
| VSIG10   | hypo  |
| VSTM2A   | hyper |
| VSTM2B   | hyper |
| VSTM2L   | hyper |
| VSX2     | hyper |
| VTRNA1-3 | hyper |
| VWA5A    | hypo  |
| VWA5B1   | hyper |
| VWC2     | hypo  |
| WASF3    | hypo  |
| WBP1     | hypo  |
| WBP2NL   | hyper |
| WBSCR16  | hypo  |
| WBSCR17  | hyper |
| WDFY1    | hyper |
| WDFY2    | hypo  |
| WDR1     | hyper |
| WDR18    | hyper |
| WDR20    | hypo  |
| WDR26    | hyper |
| WDR33    | hyper |
| WDR37    | hyper |
| WDR5     | hyper |
| WDR51A   | hypo  |
| WDR52    | hyper |
| WDR60    | hyper |
| WDR64    | hyper |
| WDR66    | hyper |
| WDR69    | hyper |
| WDR70    | hypo  |
| WDR75    | hyper |
| WDR8     | hypo  |
| WDR81    | hyper |
| WDR90    | hypo  |

|         |       |
|---------|-------|
| WEE2    | hypo  |
| WFDC10B | hypo  |
| WFS1    | hyper |
| WIPF3   | hyper |
| WIP1    | hypo  |
| WIP2    | hyper |
| WNT1    | hypo  |
| WNT10A  | hypo  |
| WNT10B  | hyper |
| WNT2    | hyper |
| WNT2B   | hyper |
| WNT3A   | hyper |
| WNT5B   | hypo  |
| WNT6    | hypo  |
| WNT7B   | hyper |
| WNT9A   | hyper |
| WSB1    | hypo  |
| WSCD1   | hypo  |
| WWP2    | hyper |
| WWTR1   | hypo  |
| XIRP1   | hypo  |
| XKR6    | hyper |
| XPNPEP3 | hypo  |
| XPO4    | hyper |
| XPO6    | hypo  |
| XPO7    | hyper |
| XRN2    | hypo  |
| YARS    | hypo  |
| YIF1A   | hypo  |
| YIPF4   | hypo  |
| YJEFN3  | hyper |
| YOD1    | hyper |
| YPEL1   | hyper |
| YPEL3   | hyper |
| YPEL4   | hyper |
| YTHDF2  | hypo  |
| YWHAG   | hyper |
| ZAK     | hyper |
| ZAP70   | hyper |
| ZBED2   | hypo  |
| ZBTB17  | hypo  |
| ZBTB2   | hypo  |
| ZBTB20  | hypo  |
| ZBTB22  | hyper |
| ZBTB34  | hypo  |
| ZBTB39  | hyper |
| ZBTB44  | hypo  |
| ZBTB46  | hypo  |
| ZBTB47  | hyper |
| ZBTB6   | hypo  |
| ZBTB7A  | hypo  |
| ZBTB8B  | hyper |
| ZC3H10  | hypo  |
| ZC3H12A | hyper |
| ZC3H13  | hyper |
| ZC3H14  | hypo  |
| ZC3H18  | hyper |
| ZC3H3   | hyper |



|         |       |
|---------|-------|
| ZC3H4   | hyper |
| ZC3H7A  | hyper |
| ZCCHC2  | hypo  |
| ZCCHC7  | hyper |
| ZDHHC17 | hyper |
| ZDHHC20 | hypo  |
| ZDHHC21 | hyper |
| ZDHHC7  | hyper |
| ZEB1    | hyper |
| ZFAND3  | hypo  |
| ZFAT    | hyper |
| ZFP161  | hypo  |
| ZFP82   | hyper |
| ZFPM1   | hyper |
| ZFR2    | hypo  |
| ZFYVE16 | hypo  |
| ZFYVE21 | hyper |
| ZIC1    | hyper |
| ZIC4    | hyper |
| ZIK1    | hyper |
| ZIM2    | hyper |
| ZKSCAN5 | hyper |
| ZMYND11 | hyper |
| ZNF114  | hyper |
| ZNF12   | hypo  |
| ZNF132  | hyper |
| ZNF140  | hypo  |
| ZNF141  | hypo  |
| ZNF146  | hypo  |
| ZNF167  | hyper |
| ZNF17   | hyper |
| ZNF197  | hyper |
| ZNF200  | hyper |
| ZNF202  | hyper |
| ZNF212  | hypo  |
| ZNF213  | hypo  |
| ZNF214  | hyper |
| ZNF215  | hyper |
| ZNF221  | hypo  |
| ZNF23   | hyper |
| ZNF232  | hyper |
| ZNF239  | hypo  |
| ZNF256  | hyper |
| ZNF283  | hyper |
| ZNF296  | hyper |
| ZNF302  | hyper |
| ZNF311  | hyper |
| ZNF318  | hyper |
| ZNF324B | hyper |
| ZNF331  | hyper |
| ZNF34   | hypo  |
| ZNF341  | hypo  |
| ZNF354A | hyper |
| ZNF354C | hypo  |
| ZNF37A  | hyper |
| ZNF384  | hyper |
| ZNF395  | hyper |
| ZNF398  | hyper |

|         |       |
|---------|-------|
| ZNF415  | hyper |
| ZNF423  | hyper |
| ZNF425  | hypo  |
| ZNF428  | hypo  |
| ZNF43   | hypo  |
| ZNF44   | hypo  |
| ZNF444  | hyper |
| ZNF445  | hypo  |
| ZNF454  | hyper |
| ZNF467  | hyper |
| ZNF469  | hyper |
| ZNF501  | hyper |
| ZNF507  | hypo  |
| ZNF512  | hypo  |
| ZNF517  | hyper |
| ZNF521  | hypo  |
| ZNF529  | hyper |
| ZNF540  | hyper |
| ZNF544  | hyper |
| ZNF554  | hyper |
| ZNF557  | hypo  |
| ZNF558  | hypo  |
| ZNF559  | hyper |
| ZNF563  | hypo  |
| ZNF57   | hypo  |
| ZNF572  | hypo  |
| ZNF574  | hyper |
| ZNF581  | hypo  |
| ZNF582  | hyper |
| ZNF595  | hyper |
| ZNF599  | hyper |
| ZNF605  | hyper |
| ZNF607  | hyper |
| ZNF609  | hyper |
| ZNF610  | hyper |
| ZNF616  | hyper |
| ZNF618  | hypo  |
| ZNF620  | hyper |
| ZNF622  | hypo  |
| ZNF623  | hyper |
| ZNF646  | hypo  |
| ZNF665  | hyper |
| ZNF667  | hyper |
| ZNF668  | hyper |
| ZNF670  | hypo  |
| ZNF687  | hyper |
| ZNF688  | hypo  |
| ZNF702P | hyper |
| ZNF709  | hyper |
| ZNF71   | hypo  |
| ZNF710  | hyper |
| ZNF718  | hyper |
| ZNF74   | hypo  |
| ZNF763  | hyper |
| ZNF773  | hypo  |
| ZNF774  | hypo  |
| ZNF775  | hypo  |
| ZNF776  | hyper |

|         |       |
|---------|-------|
| ZNF787  | hyper |
| ZNF792  | hypo  |
| ZNF793  | hyper |
| ZNF8    | hypo  |
| ZNF80   | hyper |
| ZNF816A | hyper |
| ZNF823  | hyper |
| ZNF827  | hyper |
| ZNF830  | hypo  |
| ZNF831  | hypo  |
| ZNF835  | hyper |
| ZNF837  | hyper |
| ZNF841  | hyper |
| ZNF844  | hyper |
| ZNF860  | hypo  |
| ZNF878  | hyper |
| ZNF92   | hyper |
| ZNHIT2  | hypo  |
| ZNRF2   | hypo  |
| ZNRF3   | hypo  |
| ZSCAN18 | hyper |
| ZSCAN2  | hypo  |
| ZSWIM6  | hypo  |
| ZSWIM7  | hypo  |
| ZXDC    | hypo  |
| ZYG11A  | hyper |
| ZYX     | hyper |
